# Supplementary material for: Treatment with interferon-α2b and ribavirin improves outcome in MERS-CoV–infected rhesus macaques
Source: Springer Nature journal article supplement (doi:10.1038/nm.3362), 2013-09-08
Supplement: 41591_2013_BFnm3362_MOESM28_ESM.pdf [file 41591_2013_BFnm3362_MOESM28_ESM.pdf]

**Interferon- $\alpha$ 2b and ribavirin treatment improves outcome in MERS-CoV-infected rhesus macaques**

Darryl Falzarano, Emmie de Wit, Angela L. Rasmussen, Friederike Feldmann, Atsushi Okumura, Dana P. Scott, Doug Brining, Trenton Bushmaker, Cynthia Martellaro, Laura Baseler, Arndt G. Benecke, Michael G. Katze, Vincent J. Munster, Heinz Feldmann

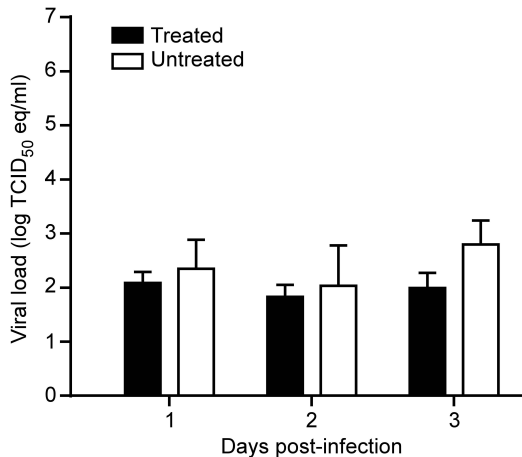

**Supplemental Figure 1.** Viral load (mean +/- SD) in bronchiolar alveolar lavage samples collected daily.

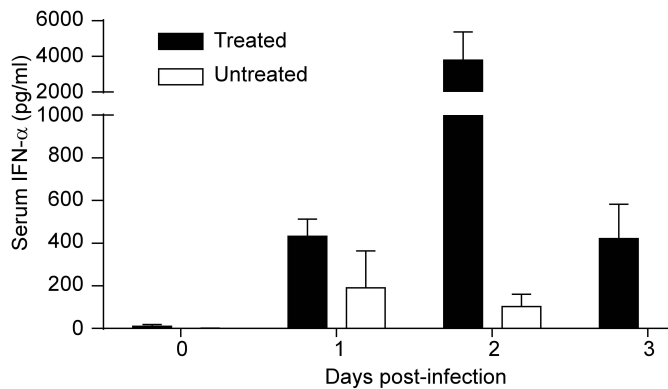

**Supplemental Figure 2.** Serum level (mean $\pm$  SD) of interferon- $\alpha$ .

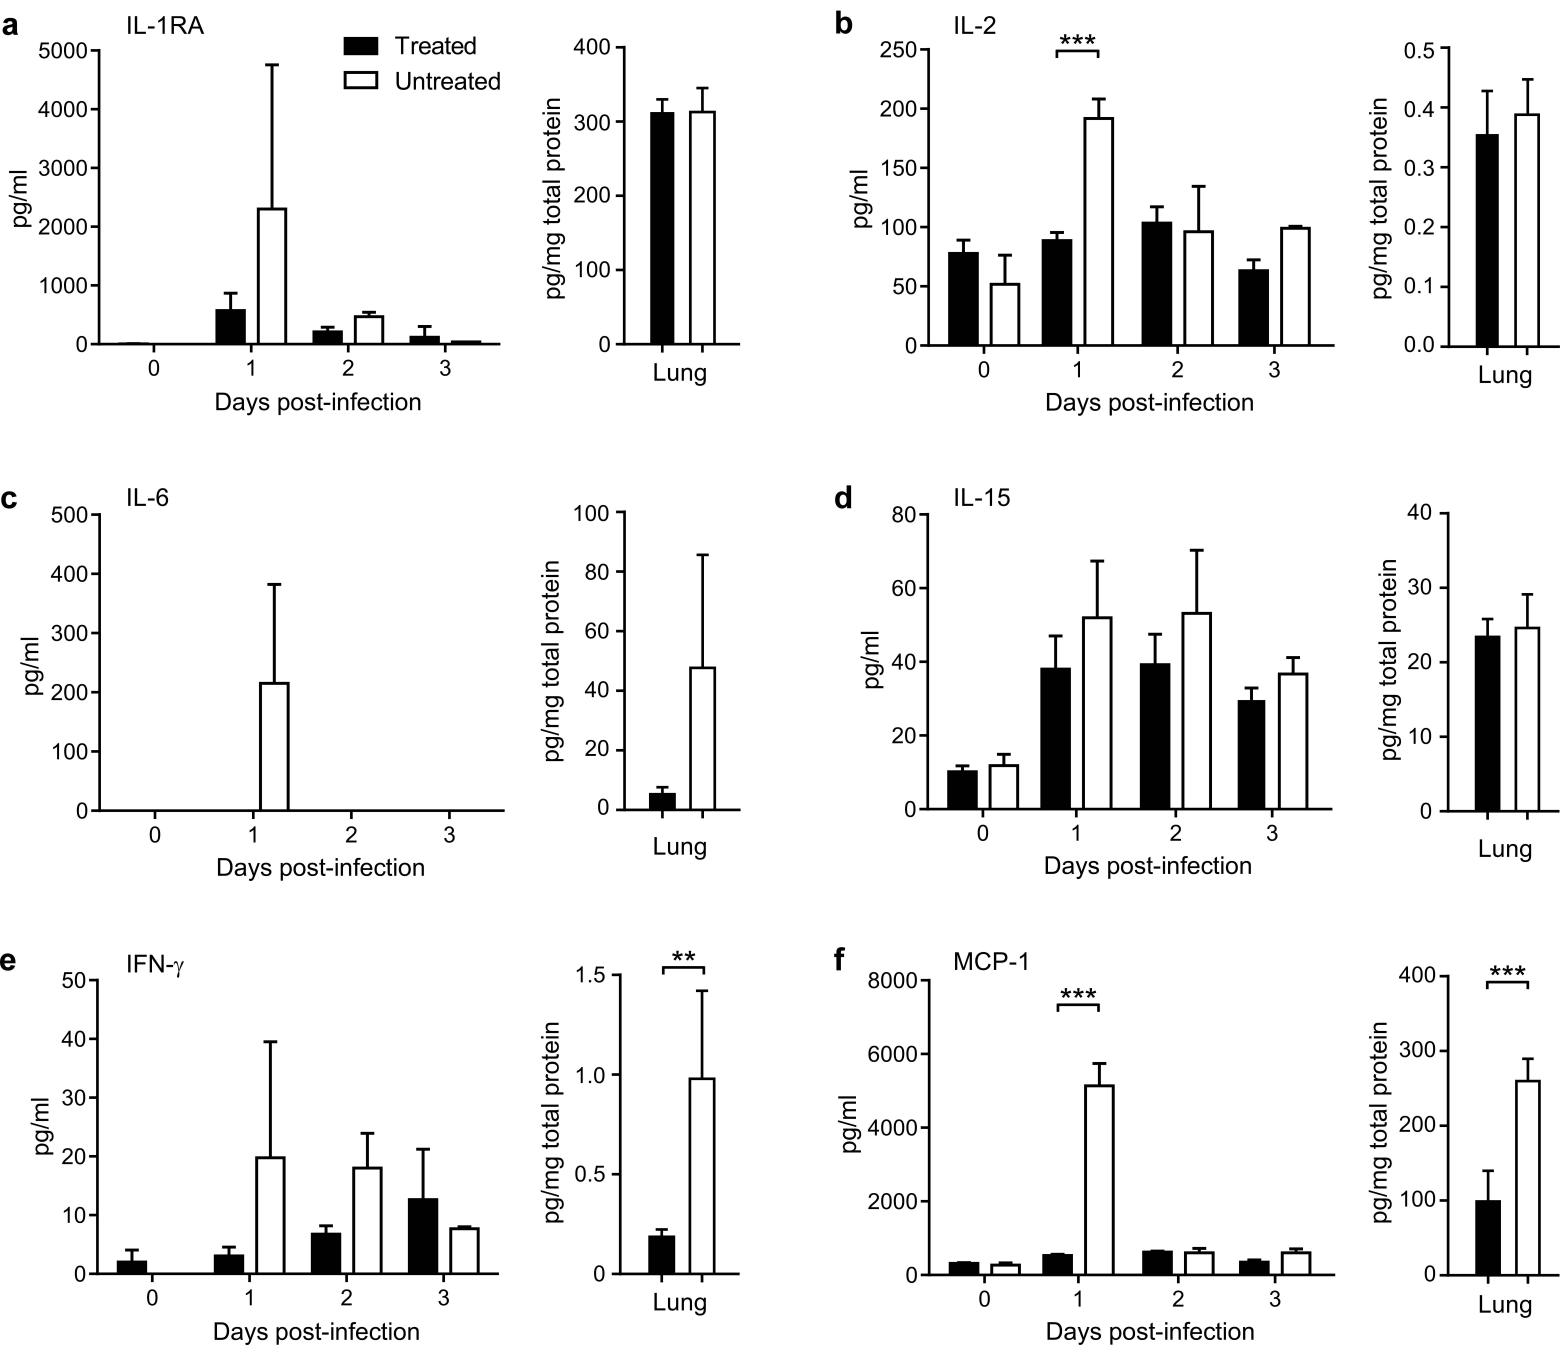

**Supplemental Figure 3.** Cytokines and chemokine levels in serum (mean  $\pm$  SD) and lung homogenate (mean  $\pm$  SEM). Only cytokines and chemokines that were above the limit of detection and showed alterations from baseline are shown. (serum – 2way ANOVA, Bonferroni's post-test; lung homogenate – t-test; \*\*  $p < 0.05$ , \*\*\*  $p < 0.001$ ).

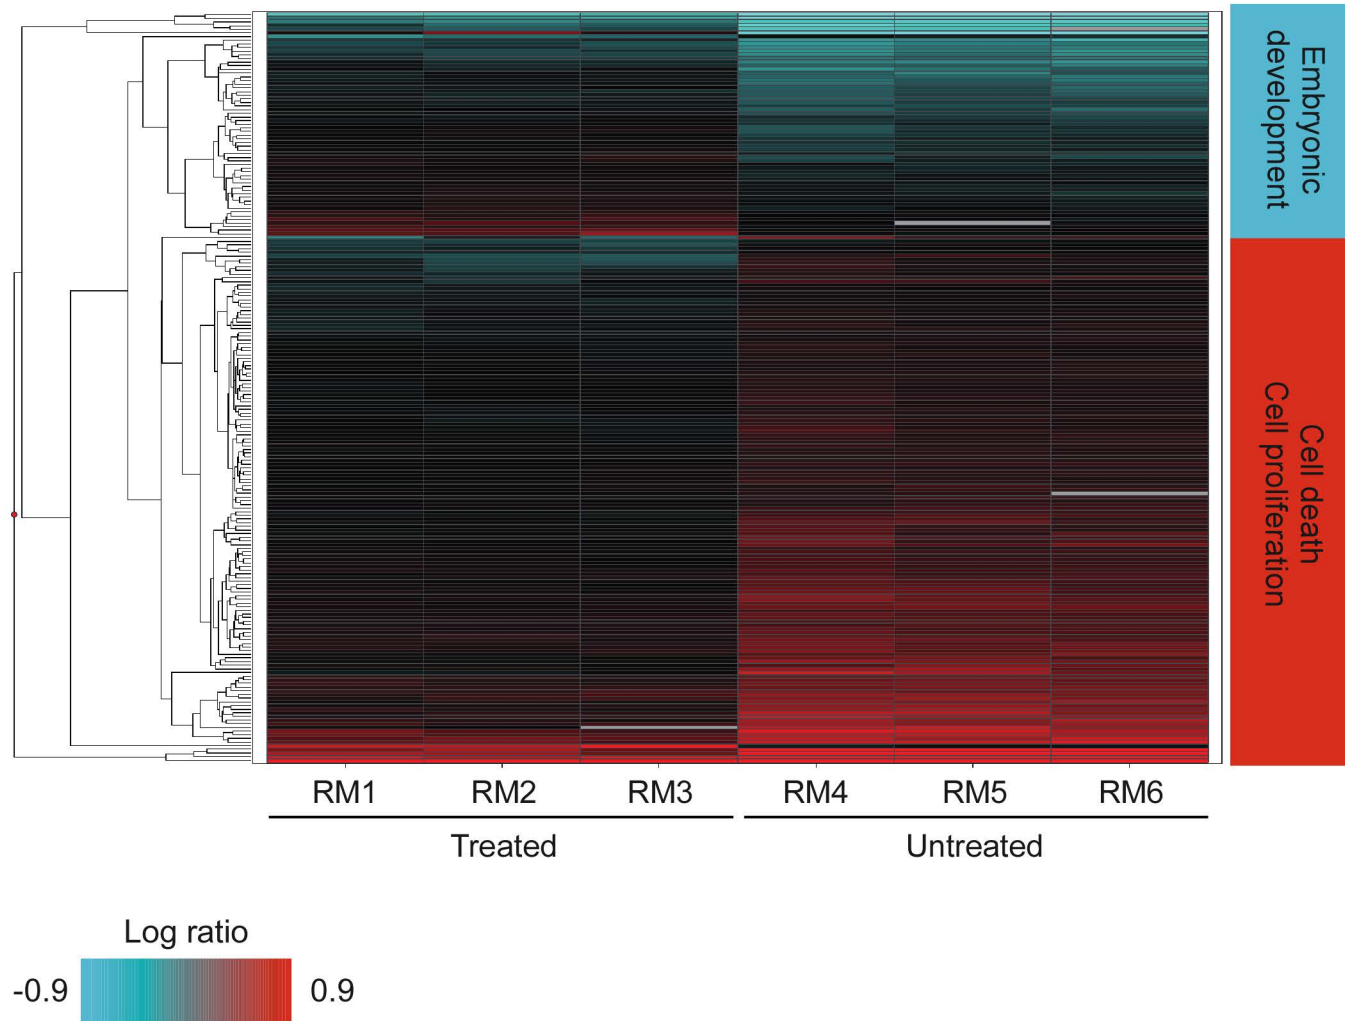

**Supplemental Figure 4.** Transcriptional signatures associated with combined interferon- $\alpha$ 2b and ribavirin treatment during MERS-CoV infection in treated and untreated animals compared to two lung specimens from uninfected rhesus macaques. Heatmap shows  $\log_{10}$  expression ratios to uninfected rhesus lung RNA for treated or untreated MERS-CoV-infected group means of 205 DEG, as determined by Welch's t-test ( $p < 0.01$ , fold change = 1.5), and grouped by hierarchical clustering. Two separate clusters of up- or down-regulated DEG relative to uninfected were identified in the untreated MERS-CoV-infected group, and IPA was used to determine functional enrichment of these clusters.

**Supplemental Table 1.** Individual clinical parameters for rhesus macaques infected with MERS-CoVand subsequently treated with interferon- $\alpha$ 2b and ribavirin or vehicle.

| <b>Treatment</b>                     | <b>Treated</b>        |                       |                       |                       | <b>Untreated</b>      |                       |
|--------------------------------------|-----------------------|-----------------------|-----------------------|-----------------------|-----------------------|-----------------------|
| Animal #                             | RM1                   | RM2                   | RM3                   | RM4                   | RM5                   | RM6                   |
| <b>Clinical observations</b>         |                       |                       |                       |                       |                       |                       |
| piloerection                         | -                     | -                     | -                     | +                     | -                     | +                     |
| increased respiration                | -                     | -                     | -                     | +                     | +                     | +                     |
| abdominal breathing                  | -                     | -                     | -                     | +                     | +                     | +                     |
| decreased food intake                | +                     | +                     | +                     | +                     | +                     | +                     |
| decreased feces                      | +                     | +                     | +                     | +                     | +                     | +                     |
| <b>Clinical lab</b>                  |                       |                       |                       |                       |                       |                       |
| WBC                                  | n/c <sup>1</sup>      | n/c                   | n/c                   | increased             | n/c                   | increased             |
| neutrophils                          | n/c                   | n/c                   | n/c                   | increased             | n/c                   | increased             |
| lymphocytes                          | transient<br>decrease | transient<br>decrease | transient<br>decrease | transient<br>decrease | transient<br>decrease | transient<br>decrease |
| monocytes                            | transient<br>decrease | transient<br>decrease | transient<br>decrease | transient<br>decrease | transient<br>decrease | transient<br>decrease |
| eosinophils                          | n/c                   | n/c                   | n/c                   | n/c                   | n/c                   | n/c                   |
| basophils                            | n/c                   | n/c                   | n/c                   | n/c                   | n/c                   | n/c                   |
| SPO <sub>2</sub>                     | n/c                   | n/c                   | n/c                   | decreased             | n/c                   | decreased             |
| x-ray (interstitial<br>infiltration) | -                     | light                 | light                 | diffuse<br>severe     | diffuse<br>bronchial  | linear                |
| inflammatory cytokines               | -                     | -                     | -                     | +                     | +                     | +                     |

<sup>1</sup>n/c – no change

**Supplemental Table 2:** Summary of radiographic findings of MERS-CoV infected rhesus macaques treated with interferon- $\alpha$ 2b and ribavirin or untreated animals. The quality and location of interstitial infiltration observed from ventral-dorsal and lateral x-rays is indicated.

|           |     | Days post-infection |                                   |                                    |                                       |
|-----------|-----|---------------------|-----------------------------------|------------------------------------|---------------------------------------|
|           |     | 0                   | 1                                 | 2                                  | 3                                     |
| Treated   | RM1 | - <sup>1</sup>      | -                                 | -                                  | -                                     |
|           | RM2 | -                   | -                                 | light<br>(RL <sup>2</sup> )        | light<br>(RL)                         |
|           | RM3 | -                   | -                                 | -                                  | light<br>(RL)                         |
| Untreated | RM4 | -                   | middle linear/nodular<br>(RL, LL) | diffuse severe<br>(RM, LM, RL, LL) | diffuse severe<br>(RM, LM, RL, LL)    |
|           | RM5 | -                   | light<br>(RM, RL)                 | bronchial<br>(RL)                  | diffuse bronchial<br>(RM, RL, LM, LL) |
|           | RM6 | -                   | middle linear<br>(RL, LL)         | middle linear<br>(RL, LL)          | linear<br>(RL, LL)                    |

<sup>1</sup>normal findings; <sup>2</sup>lung lobes - right upper (RU), right middle (RM), right lower (RL), left upper (LU), left middle (LM), left lower (LL)

**Supplemental Table 3.** Pathology scores rhesus macaques infected with MERS-CoV and subsequently treated with interferon- $\alpha$ 2b and ribavirin or vehicle.

| <b>Treatment</b>                    | <b>Treated</b>                    |            |            |            | <b>Untreated</b> |            |
|-------------------------------------|-----------------------------------|------------|------------|------------|------------------|------------|
| <b>Animal #</b>                     | <b>RM1</b>                        | <b>RM2</b> | <b>RM3</b> | <b>RM4</b> | <b>RM5</b>       | <b>RM6</b> |
| <b>Gross</b>                        | RU/RM/RL<br>LU/LM/LL <sup>1</sup> |            |            |            |                  |            |
| ventral (% affected)                | 0/0/0 <sup>2</sup>                | 0/0/0      | 0/0/0      | 0/60/60    | 20/15/30         | 0/20/0     |
|                                     | 0/0/0                             | 0/0/0      | 0/0/0      | 0/30/20    | 0/0/0            | 10/30/0    |
| dorsal (% affected)                 | 0/0/0                             | 0/0/0      | 0/0/0      | 10/0/10    | 25/5/25          | 0/40/0     |
|                                     | 0/0/0                             | 0/0/0      | 0/0/0      | 20/20/40   | 0/0/20           | 0/0/0      |
| <b>Histopathology</b>               |                                   |            |            |            |                  |            |
| acute bronchointerstitial pneumonia | 0/0/2                             | 2/2/2      | 2/2/3      | 3/4/3      | 0/4/3            | 2/2/3      |
|                                     | 0/2/3                             | 2/2/3      | 0/1/3      | 4/3/3      | 0/2/0            | 1/2/1      |
| subacute perivasculitis             | 0/0/0                             | 0/0/0      | 0/0/0      | 0/3/3      | 0/0/1            | 0/2/2      |
|                                     | 0/0/0                             | 0/0/0      | 0/0/0      | 2/0/3      | 0/0/0            | 1/2/1      |
| immunohistochemistry                | multifocal                        | multifocal | multifocal | diffuse    | multifocal       | multifocal |

<sup>1</sup>Lung lobes - right upper (RU), right middle (RM), right lower (RL), left upper (LU), left middle (LM),

left lower (LL). <sup>2</sup>Histology scoring criteria: 0 = no pathologic change. 1 = few inflammatory foci scattered

between multiple lung lobes; alveolar interstitium is minimally thickened by congestion and small

numbers of neutrophils and macrophages, few neutrophils and macrophages within alveoli. 2 = multiple

inflammatory foci present in multiple lung lobes; alveolar interstitium is mildly thickened by congestion,

edema and small numbers of neutrophils and macrophages; small numbers of neutrophils and

macrophages within alveoli. 3 = multiple inflammatory foci scattered within single lung lobes; alveolar

interstitium is moderately thickened by congestion, edema and moderate numbers of neutrophils and

macrophages; many neutrophils and macrophages within alveoli; small amounts of fibrin and edema in

alveoli. 4 = multiple to coalescing inflammatory foci within a single lung lobe; alveolar interstitium is

markedly thickened by congestion, edema, fibrin and large numbers of neutrophils and macrophages;

large numbers of neutrophils, macrophages, cellular debris, fibrin and edema within alveoli.



**Supplemental Table 4.** Annotation of the fold change of differentially expressed genes (DEG) from the right lower lung of individual animal during MERS-CoV infection in interferon- $\alpha$ 2b and ribavirin treated and untreated animals compared to two lung specimens from uninfected rhesus macaques.

| Agilent Probe Identifier | GeneName     | Description                                                                                                                                                          | Heatmap order |
|--------------------------|--------------|----------------------------------------------------------------------------------------------------------------------------------------------------------------------|---------------|
| A_01_P012775             | NM_033258    | Homo sapiens guanine nucleotide binding protein (G protein), gamma 8 (GNG8), mRNA [NM_033258]                                                                        | 1             |
| A_01_P001570             | NM_177444    | Homo sapiens PTPRF interacting protein, binding protein 1 (liprin beta 1) (PPFIBP1), transcript variant 2, mRNA. [NM_177444]                                         | 2             |
| A_01_P015030             | NM_006925    | Homo sapiens splicing factor, arginine/serine-rich 5 (SFRS5), mRNA [NM_006925]                                                                                       | 3             |
| A_01_P005258             | A_01_P005258 | Unknown                                                                                                                                                              | 4             |
| A_01_P015666             | NM_080718    | Homo sapiens T-box 5 (TBX5), transcript variant 2, mRNA [NM_080718]                                                                                                  | 5             |
| A_01_P013420             | NM_153007    | Homo sapiens outer dense fiber of sperm tails 4 (ODF4), mRNA [NM_153007]                                                                                             | 6             |
| A_01_P016243             | NM_000383    | Homo sapiens autoimmune regulator (autoimmune polyendocrinopathy candidiasis ectodermal dystrophy) (AIRE), transcript variant AIRE-1, mRNA. [NM_000383]              | 7             |
| A_01_P005641             | NM_005269    | Homo sapiens glioma-associated oncogene homolog (zinc finger protein) (GLI), mRNA [NM_005269]                                                                        | 8             |
| A_01_P000976             | XR_010623    | PREDICTED: Macaca mulatta SET binding protein 1 (SETBP1), mRNA [XR_010623]                                                                                           | 9             |
| A_01_P019934             | NM_198085    | Homo sapiens ring finger protein 148 (RNF148), mRNA. [NM_198085]                                                                                                     | 10            |
| A_01_P015223             | NM_144490    | Homo sapiens A kinase (PRKA) anchor protein 11 (AKAP11), transcript variant 2, mRNA. [NM_144490]                                                                     | 11            |
| A_01_P000586             | NM_006715    | Homo sapiens mannosidase, alpha, class 2C, member 1 (MAN2C1), mRNA [NM_006715]                                                                                       | 12            |
| A_01_P014996             | CN641686     | ILLUMIGEN_MCQ_5182 Katze_MMBR Macaca mulatta cDNA clone IBIUW:5989 5' similar to Bases 11 to 612 highly similar to human Unigene Hs.445038, mRNA sequence [CN641686] | 13            |
| A_01_P009533             | NM_020752    | Homo sapiens G protein-coupled receptor 158 (GPR158), mRNA. [NM_020752]                                                                                              | 14            |
| A_01_P013708             | NM_001008234 | Homo sapiens hypothetical gene supported by BC036588 (LOC400657), mRNA.                                                                                              | 15            |

|                     |              |                                                                                                                                                                          |    |
|---------------------|--------------|--------------------------------------------------------------------------------------------------------------------------------------------------------------------------|----|
|                     |              | [NM_001008234]                                                                                                                                                           |    |
| <b>A_01_P009763</b> | NM_001277    | Homo sapiens choline kinase alpha (CHKA), transcript variant 1, mRNA [NM_001277]                                                                                         | 16 |
| <b>A_01_P015392</b> | NM_001004299 | Homo sapiens FLJ43980 protein (FLJ43980), mRNA. [NM_001004299]                                                                                                           | 17 |
| <b>A_01_P008374</b> | NM_080759    | Homo sapiens dachshund homolog 1 (Drosophila) (DACH1), transcript variant 1, mRNA [NM_080759]                                                                            | 18 |
| <b>A_01_P007050</b> | A_01_P007050 | Unknown                                                                                                                                                                  | 19 |
| <b>A_01_P000634</b> | A_01_P000634 | Unknown                                                                                                                                                                  | 20 |
| <b>A_01_P016238</b> | XR_013013    | PREDICTED: Macaca mulatta similar to Zinc finger CW-type PWWP domain protein 1 homolog (LOC711911), mRNA [XR_013013]                                                     | 21 |
| <b>A_01_P014052</b> | XR_011148    | PREDICTED: Macaca mulatta similar to CG8841-PA, isoform A (LOC699954), mRNA [XR_011148]                                                                                  | 22 |
| <b>A_01_P009995</b> | NM_017514    | Homo sapiens plexin A3 (PLXNA3), mRNA [NM_017514]                                                                                                                        | 23 |
| <b>A_01_P018522</b> | NM_018257    | Homo sapiens chromosome 20 open reading frame 36 (C20orf36), mRNA [NM_018257]                                                                                            | 24 |
| <b>A_01_P001327</b> | NM_000193    | Homo sapiens sonic hedgehog homolog (Drosophila) (SHH), mRNA [NM_000193]                                                                                                 | 25 |
| <b>A_01_P002642</b> | NM_182975    | Homo sapiens hypothetical protein FLJ20403 (FLJ20403), transcript variant 3, mRNA [NM_182975]                                                                            | 26 |
| <b>A_01_P012281</b> | NM_130390    | Homo sapiens tripartite motif-containing 34 (TRIM34), transcript variant 3, mRNA. [NM_130390]                                                                            | 27 |
| <b>A_01_P004470</b> | NM_017644    | Homo sapiens DRE1 protein (DRE1), mRNA [NM_017644]                                                                                                                       | 28 |
| <b>A_01_P013869</b> | NM_183242    | Homo sapiens BTB (POZ) domain containing 8 (BTBD8), mRNA [NM_183242]                                                                                                     | 29 |
| <b>A_01_P019891</b> | CO725485     | ILLUMIGEN_MCQ_35171 Katze_MMPL Macaca mulatta cDNA clone IBIUW:26108 5' similar to Bases 1 to 543 highly similar to human PPP1R14A (Hs.348037), mRNA sequence [CO725485] | 30 |
| <b>A_01_P008164</b> | CN644139     | ILLUMIGEN_MCQ_9651 Katze_MMBR Macaca mulatta cDNA clone IBIUW:8946 5' similar to Bases 3 to 316 highly similar to human RAMP1 (Hs.32989), mRNA sequence [CN644139]       | 31 |
| <b>A_01_P018564</b> | NM_017737    | Homo sapiens chromosome 1 open reading frame 39 (C1orf39), mRNA [NM_017737]                                                                                              | 32 |
| <b>A_01_P005675</b> | NM_199334    | Homo sapiens thyroid hormone receptor, alpha (erythroblastic leukemia viral (v-erb-a) oncogene homolog, avian) (THRA),                                                   | 33 |

|                     |              |                                                                                                                                                                      |    |
|---------------------|--------------|----------------------------------------------------------------------------------------------------------------------------------------------------------------------|----|
|                     |              | transcript variant 1, mRNA [NM_199334]                                                                                                                               |    |
| <b>A_01_P017541</b> | NM_018179    | Homo sapiens activating transcription factor 7 interacting protein (ATF7IP), mRNA [NM_018179]                                                                        | 34 |
| <b>A_01_P014631</b> | NM_182633    | Homo sapiens hypothetical protein FLJ39963 (FLJ39963), mRNA [NM_182633]                                                                                              | 35 |
| <b>A_01_P000010</b> | NM_001298    | Homo sapiens cyclic nucleotide gated channel alpha 3 (CNGA3), mRNA. [NM_001298]                                                                                      | 36 |
| <b>A_01_P005762</b> | NM_019092    | Homo sapiens hypothetical protein KIAA1164 (KIAA1164), mRNA [NM_019092]                                                                                              | 37 |
| <b>A_01_P012875</b> | NM_022165    | Homo sapiens lin-7 homolog B (C. elegans) (LIN7B), mRNA. [NM_022165]                                                                                                 | 38 |
| <b>A_01_P011760</b> | NM_024335    | Homo sapiens iroquois homeobox protein 6 (IRX6), mRNA. [NM_024335]                                                                                                   | 39 |
| <b>A_01_P014819</b> | NM_024014    | Homo sapiens homeo box A6 (HOXA6), mRNA. [NM_024014]                                                                                                                 | 40 |
| <b>A_01_P000276</b> | NM_145043    | Homo sapiens nei like 2 (E. coli) (NEIL2), mRNA. [NM_145043]                                                                                                         | 41 |
| <b>A_01_P000450</b> | NM_016442    | Homo sapiens type 1 tumor necrosis factor receptor shedding aminopeptidase regulator (ARTS-1), mRNA [NM_016442]                                                      | 42 |
| <b>A_01_P007931</b> | NM_014555    | Homo sapiens transient receptor potential cation channel, subfamily M, member 5 (TRPM5), mRNA. [NM_014555]                                                           | 43 |
| <b>A_01_P019047</b> | CO645097     | ILLUMIGEN_MCQ_7508 Katze_MMBR Macaca mulatta cDNA clone IBIUW:22673 5' similar to Bases 1 to 285 highly similar to human BTEB1 (Hs.150557), mRNA sequence [CO645097] | 44 |
| <b>A_01_P017266</b> | NM_005468    | Homo sapiens N-acetylated alpha-linked acidic dipeptidase-like 1 (NAALADL1), mRNA [NM_005468]                                                                        | 45 |
| <b>A_01_P014672</b> | NM_145201    | Homo sapiens similar to CG3714 gene product (PP3856), mRNA. [NM_145201]                                                                                              | 46 |
| <b>A_01_P010687</b> | NM_001007278 | Homo sapiens ret finger protein 2 (RFP2), transcript variant 4, mRNA. [NM_001007278]                                                                                 | 47 |
| <b>A_01_P010032</b> | XR_013358    | PREDICTED: Macaca mulatta similar to Calretinin (CR) (LOC708409), mRNA [XR_013358]                                                                                   | 48 |
| <b>A_01_P000341</b> | NM_003466    | Homo sapiens paired box gene 8 (PAX8), transcript variant PAX8A, mRNA [NM_003466]                                                                                    | 49 |
| <b>A_01_P012207</b> | XR_012806    | PREDICTED: Macaca mulatta similar to cyclic nucleotide gated channel alpha 1 (LOC704891), mRNA [XR_012806]                                                           | 50 |
| <b>A_01_P005375</b> | NM_030751    | Homo sapiens transcription factor 8                                                                                                                                  | 51 |

|                     |              |                                                                                                                                                       |    |
|---------------------|--------------|-------------------------------------------------------------------------------------------------------------------------------------------------------|----|
|                     |              | (represses interleukin 2 expression) (TCF8), mRNA [NM_030751]                                                                                         |    |
| <b>A_01_P013583</b> | NM_173197    | Homo sapiens Kv channel interacting protein 2 (KCNIP2), transcript variant 7, mRNA [NM_173197]                                                        | 52 |
| <b>A_01_P013463</b> | NM_013333    | Homo sapiens epsin 1 (EPN1), mRNA [NM_013333]                                                                                                         | 53 |
| <b>A_01_P003557</b> | NM_006550    | Homo sapiens fibrinogen silencer binding protein (FSBP), mRNA [NM_006550]                                                                             | 54 |
| <b>A_01_P019269</b> | NM_023039    | Homo sapiens ankyrin repeat, family A (RFXANK-like), 2 (ANKRA2), mRNA. [NM_023039]                                                                    | 55 |
| <b>A_01_P018145</b> | AB021124     | Homo sapiens mRNA for N-acetylglucosamine 6-O-sulfotransferase, complete cds [AB021124]                                                               | 56 |
| <b>A_01_P007500</b> | NM_007038    | Homo sapiens a disintegrin-like and metalloprotease (reprolysin type) with thrombospondin type 1 motif, 5 (aggrecanase-2) (ADAMTS5), mRNA [NM_007038] | 57 |
| <b>A_01_P002915</b> | NM_016585    | Homo sapiens Theg homolog (mouse) (THEG), transcript variant 1, mRNA [NM_016585]                                                                      | 58 |
| <b>A_01_P016236</b> | NM_080662    | Homo sapiens peroxisomal biogenesis factor 11 gamma (PEX11G), mRNA. [NM_080662]                                                                       | 59 |
| <b>A_01_P013045</b> | NM_198057    | Homo sapiens delta sleep inducing peptide, immunoreactor (DSIPI), transcript variant 1, mRNA [NM_198057]                                              | 60 |
| <b>A_01_P017300</b> | A_01_P017300 | Unknown                                                                                                                                               | 61 |
| <b>A_01_P013448</b> | NM_052913    | Homo sapiens KIAA1913 (KIAA1913), mRNA [NM_052913]                                                                                                    | 62 |
| <b>A_01_P017707</b> | NM_153704    | Homo sapiens hypothetical protein MGC26979 (MGC26979), mRNA [NM_153704]                                                                               | 63 |
| <b>A_01_P010205</b> | NM_212479    | Homo sapiens zinc finger, MYND domain containing 11 (ZMYND11), transcript variant 2, mRNA [NM_212479]                                                 | 64 |
| <b>A_01_P018687</b> | NM_005239    | Homo sapiens v-ets erythroblastosis virus E26 oncogene homolog 2 (avian) (ETS2), mRNA. [NM_005239]                                                    | 65 |
| <b>A_01_P015983</b> | NM_001004346 | Homo sapiens methylenetetrahydrofolate dehydrogenase (NADP+ dependent) 2-like (MTHFD2L), mRNA. [NM_001004346]                                         | 66 |
| <b>A_01_P016005</b> | NM_006500    | Homo sapiens melanoma cell adhesion molecule (MCAM), mRNA. [NM_006500]                                                                                | 67 |
| <b>A_01_P013348</b> | NM_031452    | Homo sapiens chromosome 6 open reading frame 119 (C6orf119), mRNA [NM_031452]                                                                         | 68 |
| <b>A_01_P014859</b> | NM_031452    | Homo sapiens chromosome 6 open reading                                                                                                                | 69 |

|                     |           |                                                                                                                                                                                  |    |
|---------------------|-----------|----------------------------------------------------------------------------------------------------------------------------------------------------------------------------------|----|
|                     |           | frame 119 (C6orf119), mRNA<br>[NM_031452]                                                                                                                                        |    |
| <b>A_01_P010378</b> | NM_153615 | Homo sapiens Ral-GDS related protein Rgr (Rgr), mRNA. [NM_153615]                                                                                                                | 70 |
| <b>A_01_P019415</b> | NM_001384 | Homo sapiens DPH2-like 2 ( <i>S. cerevisiae</i> ) (DPH2L2), transcript variant 1, mRNA [NM_001384]                                                                               | 71 |
| <b>A_01_P007301</b> | NM_014446 | Homo sapiens integrin beta 1 binding protein 3 (ITGB1BP3), mRNA. [NM_014446]                                                                                                     | 72 |
| <b>A_01_P001601</b> | NM_017662 | Homo sapiens transient receptor potential cation channel, subfamily M, member 6 (TRPM6), mRNA [NM_017662]                                                                        | 73 |
| <b>A_01_P000722</b> | NM_198321 | Homo sapiens UDP-N-acetyl-alpha-D-galactosamine:polypeptide N-acetylgalactosaminyltransferase 10 (GalNAc-T10) (GALNT10), transcript variant 1, mRNA [NM_198321]                  | 74 |
| <b>A_01_P016846</b> | NM_014777 | Homo sapiens KIAA0133 (KIAA0133), mRNA. [NM_014777]                                                                                                                              | 75 |
| <b>A_01_P013231</b> | NM_015531 | Homo sapiens DKFZP586P0123 protein (DKFZP586P0123), mRNA. [NM_015531]                                                                                                            | 76 |
| <b>A_01_P002804</b> | NM_003463 | Homo sapiens protein tyrosine phosphatase type IVA, member 1 (PTP4A1), mRNA. [NM_003463]                                                                                         | 77 |
| <b>A_01_P005748</b> | NM_032476 | Homo sapiens mitochondrial ribosomal protein S6 (MRPS6), nuclear gene encoding mitochondrial protein, mRNA. [NM_032476]                                                          | 78 |
| <b>A_01_P016006</b> | NM_181671 | Homo sapiens phosphatidylinositol transfer protein, cytoplasmic 1 (PITPNC1), transcript variant 2, mRNA [NM_181671]                                                              | 79 |
| <b>A_01_P014049</b> | NM_014503 | Homo sapiens down-regulated in metastasis (DRIM), mRNA. [NM_014503]                                                                                                              | 80 |
| <b>A_01_P009126</b> | NM_032704 | Homo sapiens tubulin alpha 6 (TUBA6), mRNA [NM_032704]                                                                                                                           | 81 |
| <b>A_01_P019374</b> | NM_004219 | Homo sapiens pituitary tumor-transforming 1 (PTTG1), mRNA [NM_004219]                                                                                                            | 82 |
| <b>A_01_P008639</b> | XR_012838 | PREDICTED: Macaca mulatta similar to activating transcription factor 7 interacting protein 2 (LOC710224), mRNA [XR_012838]                                                       | 83 |
| <b>A_01_P016853</b> | NM_017837 | Homo sapiens phosphatidylinositol glycan, class V (PIGV), mRNA. [NM_017837]                                                                                                      | 84 |
| <b>A_01_P017505</b> | XR_010563 | PREDICTED: Macaca mulatta similar to Securin (Pituitary tumor-transforming protein 1) (Tumor transforming protein 1) (Esp1-associated protein) (hPTTG) (PTTG1), mRNA [XR_010563] | 85 |
| <b>A_01_P015605</b> | XR_011110 | PREDICTED: Macaca mulatta zinc finger, DHHC domain containing 9 (ZDHHC9),                                                                                                        | 86 |

| mRNA [XR_011110]    |              |                                                                                                                  |     |
|---------------------|--------------|------------------------------------------------------------------------------------------------------------------|-----|
| <b>A_01_P004865</b> | NM_018369    | Homo sapiens DEP domain containing 1B (DEPDC1B), mRNA [NM_018369]                                                | 87  |
| <b>A_01_P015413</b> | NM_003929    | Homo sapiens RAB7, member RAS oncogene family-like 1 (RAB7L1), mRNA. [NM_003929]                                 | 88  |
| <b>A_01_P009025</b> | NM_006352    | Homo sapiens zinc finger protein 238 (ZNF238), transcript variant 2, mRNA [NM_006352]                            | 89  |
| <b>A_01_P007655</b> | NM_177435    | Homo sapiens peroxisome proliferative activated receptor, delta (PPARD), transcript variant 2, mRNA. [NM_177435] | 90  |
| <b>A_01_P015055</b> | NM_005810    | Homo sapiens killer cell lectin-like receptor subfamily G, member 1 (KLRG1), mRNA. [NM_005810]                   | 91  |
| <b>A_01_P007235</b> | NM_032830    | Homo sapiens cirrhosis, autosomal recessive 1A (cirhin) (CIRH1A), mRNA [NM_032830]                               | 92  |
| <b>A_01_P006726</b> | NM_007355    | Homo sapiens heat shock 90kDa protein 1, beta (HSPCB), mRNA [NM_007355]                                          | 93  |
| <b>A_01_P014085</b> | XR_014668    | PREDICTED: Macaca mulatta similar to chromatin assembly factor 1, subunit A (p150) (LOC721861), mRNA [XR_014668] | 94  |
| <b>A_01_P019627</b> | NM_016138    | Homo sapiens coenzyme Q7 homolog, ubiquinone (yeast) (COQ7), mRNA. [NM_016138]                                   | 95  |
| <b>A_01_P005178</b> | NM_022470    | Homo sapiens p53 target zinc finger protein (WIG1), transcript variant 1, mRNA [NM_022470]                       | 96  |
| <b>A_01_P017208</b> | NM_022470    | Homo sapiens p53 target zinc finger protein (WIG1), transcript variant 1, mRNA [NM_022470]                       | 97  |
| <b>A_01_P010568</b> | NM_005827    | Homo sapiens solute carrier family 35, member B1 (SLC35B1), mRNA [NM_005827]                                     | 98  |
| <b>A_01_P007529</b> | XR_013160    | PREDICTED: Macaca mulatta similar to tubulin, beta polypeptide 4, member Q (LOC708952), mRNA [XR_013160]         | 99  |
| <b>A_01_P017493</b> | XR_013160    | PREDICTED: Macaca mulatta similar to tubulin, beta polypeptide 4, member Q (LOC708952), mRNA [XR_013160]         | 100 |
| <b>A_01_P006652</b> | NM_001001132 | Homo sapiens intersectin 1 (SH3 domain protein) (ITSN1), transcript variant 2, mRNA [NM_001001132]               | 101 |
| <b>A_01_P013066</b> | NM_021204    | Homo sapiens E-1 enzyme (MASA), mRNA. [NM_021204]                                                                | 102 |
| <b>A_01_P017065</b> | NM_014473    | Homo sapiens dimethyladenosine transferase (HSA9761), mRNA. [NM_014473]                                          | 103 |
| <b>A_01_P017815</b> | NM_032175    | Homo sapiens hypothetical protein                                                                                | 104 |

|                     |           |                                                                                                                                   |     |
|---------------------|-----------|-----------------------------------------------------------------------------------------------------------------------------------|-----|
|                     |           | FLJ12787 (FLJ12787), mRNA<br>[NM_032175]                                                                                          |     |
| <b>A_01_P010440</b> | NM_032869 | Homo sapiens NudC domain containing 1 (NUDCD1), mRNA. [NM_032869]                                                                 | 105 |
| <b>A_01_P006249</b> | NM_016955 | Homo sapiens soluble liver antigen/liver pancreas antigen (SLA/LP), mRNA [NM_016955]                                              | 106 |
| <b>A_01_P016495</b> | NM_006938 | Homo sapiens small nuclear ribonucleoprotein D1 polypeptide 16kDa (SNRPD1), mRNA. [NM_006938]                                     | 107 |
| <b>A_01_P001688</b> | NM_001090 | Homo sapiens ATP-binding cassette, sub-family F (GCN20), member 1 (ABCF1), transcript variant 2, mRNA. [NM_001090]                | 108 |
| <b>A_01_P004130</b> | NM_024923 | Homo sapiens nucleoporin 210kDa (NUP210), mRNA. [NM_024923]                                                                       | 109 |
| <b>A_01_P003118</b> | NM_002014 | Homo sapiens FK506 binding protein 4, 59kDa (FKBP4), mRNA [NM_002014]                                                             | 110 |
| <b>A_01_P013026</b> | NM_032656 | Homo sapiens DEAH (Asp-Glu-Ala-His) box polypeptide 37 (DHX37), mRNA. [NM_032656]                                                 | 111 |
| <b>A_01_P001001</b> | NM_003038 | Homo sapiens solute carrier family 1 (glutamate/neutral amino acid transporter), member 4 (SLC1A4), mRNA. [NM_003038]             | 112 |
| <b>A_01_P009315</b> | NM_015179 | Homo sapiens KIAA0690 (KIAA0690), mRNA. [NM_015179]                                                                               | 113 |
| <b>A_01_P013795</b> | NM_005348 | Homo sapiens heat shock 90kDa protein 1, alpha (HSPCA), mRNA [NM_005348]                                                          | 114 |
| <b>A_01_P004185</b> | NM_032590 | Homo sapiens F-box and leucine-rich repeat protein 10 (FBXL10), mRNA [NM_032590]                                                  | 115 |
| <b>A_01_P006029</b> | NM_138395 | Homo sapiens methionine-tRNA synthetase 2 (mitochondrial) (MARS2), nuclear gene encoding mitochondrial protein, mRNA. [NM_138395] | 116 |
| <b>A_01_P013636</b> | XR_009709 | PREDICTED: Macaca mulatta hypothetical protein LOC693502 (LOC693502), mRNA [XR_009709]                                            | 117 |
| <b>A_01_P001869</b> | NM_012453 | Homo sapiens transducin (beta)-like 2 (TBL2), transcript variant 1, mRNA. [NM_012453]                                             | 118 |
| <b>A_01_P015247</b> | NM_003818 | Homo sapiens CDP-diacylglycerol synthase (phosphatidate cytidyltransferase) 2 (CDS2), mRNA [NM_003818]                            | 119 |
| <b>A_01_P013342</b> | NM_024098 | Homo sapiens hypothetical protein MGC2574 (MGC2574), mRNA [NM_024098]                                                             | 120 |
| <b>A_01_P003619</b> | NM_015425 | Homo sapiens polymerase (RNA) I polypeptide A, 194kDa (POLR1A), mRNA [NM_015425]                                                  | 121 |
| <b>A_01_P017868</b> | NM_006170 | Homo sapiens nucleolar protein 1, 120kDa (NOL1), mRNA. [NM_006170]                                                                | 122 |

|                     |           |                                                                                                                                                                                |     |
|---------------------|-----------|--------------------------------------------------------------------------------------------------------------------------------------------------------------------------------|-----|
| <b>A_01_P011637</b> | NM_001069 | Homo sapiens tubulin, beta polypeptide (TUBB), mRNA [NM_001069]                                                                                                                | 123 |
| <b>A_01_P013112</b> | NM_018130 | Homo sapiens SHQ1 homolog ( <i>S. cerevisiae</i> ) (SHQ1), mRNA. [NM_018130]                                                                                                   | 124 |
| <b>A_01_P008218</b> | NM_003751 | Homo sapiens eukaryotic translation initiation factor 3, subunit 9 eta, 116kDa (EIF3S9), transcript variant 1, mRNA [NM_003751]                                                | 125 |
| <b>A_01_P009978</b> | NM_002342 | Homo sapiens lymphotoxin beta receptor (TNFR superfamily, member 3) (LTBR), mRNA. [NM_002342]                                                                                  | 126 |
| <b>A_01_P001694</b> | NM_017437 | Homo sapiens cleavage and polyadenylation specific factor 2, 100kDa (CPSF2), mRNA [NM_017437]                                                                                  | 127 |
| <b>A_01_P006095</b> | XR_011934 | PREDICTED: <i>Macaca mulatta</i> DnaJ (Hsp40) homolog, subfamily A, member 3 (DNAJA3), mRNA [XR_011934]                                                                        | 128 |
| <b>A_01_P006714</b> | NM_006638 | Homo sapiens ribonuclease P 40kDa subunit (RPP40), mRNA [NM_006638]                                                                                                            | 129 |
| <b>A_01_P017440</b> | NM_016936 | Homo sapiens ubinuclein 1 (UBN1), mRNA. [NM_016936]                                                                                                                            | 130 |
| <b>A_01_P019887</b> | NM_001303 | Homo sapiens COX10 homolog, cytochrome c oxidase assembly protein, heme A: farnesyltransferase (yeast) (COX10), nuclear gene encoding mitochondrial protein, mRNA. [NM_001303] | 131 |
| <b>A_01_P007128</b> | NM_207475 | Homo sapiens FLJ90680 protein (FLJ90680), mRNA. [NM_207475]                                                                                                                    | 132 |
| <b>A_01_P009624</b> | NM_005441 | Homo sapiens chromatin assembly factor 1, subunit B (p60) (CHAF1B), mRNA [NM_005441]                                                                                           | 133 |
| <b>A_01_P018559</b> | NM_144652 | Homo sapiens leucine zipper-EF-hand containing transmembrane protein 2 (LETM2), mRNA. [NM_144652]                                                                              | 134 |
| <b>A_01_P019654</b> | NM_152342 | Homo sapiens chromodomain protein, Y-like 2 (CDYL2), mRNA [NM_152342]                                                                                                          | 135 |
| <b>A_01_P018173</b> | NM_001069 | Homo sapiens tubulin, beta polypeptide (TUBB), mRNA [NM_001069]                                                                                                                | 136 |
| <b>A_01_P016934</b> | NM_000247 | Homo sapiens MHC class I polypeptide-related sequence A (MICA), mRNA. [NM_000247]                                                                                              | 137 |
| <b>A_01_P018984</b> | XR_013586 | PREDICTED: <i>Macaca mulatta</i> similar to Protein C7orf19 (LOC715014), mRNA [XR_013586]                                                                                      | 138 |
| <b>A_01_P010051</b> | NM_033084 | Homo sapiens Fanconi anemia, complementation group D2 (FANCD2), mRNA [NM_033084]                                                                                               | 139 |
| <b>A_01_P011284</b> | NM_004153 | Homo sapiens origin recognition complex, subunit 1-like (yeast) (ORC1L), mRNA [NM_004153]                                                                                      | 140 |



|                     |           |                                                                                                              |     |
|---------------------|-----------|--------------------------------------------------------------------------------------------------------------|-----|
| <b>A_01_P005221</b> | NM_025250 | Homo sapiens tweety homolog 3 (Drosophila) (TTYH3), mRNA. [NM_025250]                                        | 141 |
| <b>A_01_P010142</b> | NM_005444 | Homo sapiens RCD1 required for cell differentiation I homolog (S. pombe) (RQCD1), mRNA [NM_005444]           | 142 |
| <b>A_01_P019557</b> | NM_005627 | Homo sapiens serum/glucocorticoid regulated kinase (SGK), mRNA [NM_005627]                                   | 143 |
| <b>A_01_P007125</b> | NM_001905 | Homo sapiens CTP synthase (CTPS), mRNA. [NM_001905]                                                          | 144 |
| <b>A_01_P006066</b> | NM_000480 | Homo sapiens adenosine monophosphate deaminase (isoform E) (AMPD3), transcript variant 1, mRNA. [NM_000480]  | 145 |
| <b>A_01_P010018</b> | NM_144675 | Homo sapiens hypothetical protein MGC18079 (MGC18079), mRNA [NM_144675]                                      | 146 |
| <b>A_01_P009239</b> | NM_153702 | Homo sapiens hypothetical protein MGC10084 (MGC10084), mRNA [NM_153702]                                      | 147 |
| <b>A_01_P013107</b> | NM_024708 | Homo sapiens ankyrin repeat and SOCS box-containing 7 (ASB7), transcript variant 1, mRNA [NM_024708]         | 148 |
| <b>A_01_P011070</b> | NM_012111 | Homo sapiens AHA1, activator of heat shock 90kDa protein ATPase homolog 1 (yeast) (AHSA1), mRNA. [NM_012111] | 149 |
| <b>A_01_P010690</b> | NM_012177 | Homo sapiens F-box protein 5 (FBXO5), mRNA. [NM_012177]                                                      | 150 |
| <b>A_01_P019909</b> | NM_017813 | Homo sapiens hypothetical protein FLJ20421 (FLJ20421), mRNA [NM_017813]                                      | 151 |
| <b>A_01_P010182</b> | NM_000946 | Homo sapiens primase, polypeptide 1, 49kDa (PRIM1), mRNA. [NM_000946]                                        | 152 |
| <b>A_01_P015483</b> | NM_213636 | Homo sapiens PDZ and LIM domain 7 (enigma) (PDLIM7), transcript variant 4, mRNA [NM_213636]                  | 153 |
| <b>A_01_P019486</b> | NM_024096 | Homo sapiens XTP3-transactivated protein A (XTP3TPA), mRNA. [NM_024096]                                      | 154 |
| <b>A_01_P006705</b> | NM_032822 | Homo sapiens hypothetical protein FLJ14668 (FLJ14668), mRNA [NM_032822]                                      | 155 |
| <b>A_01_P001970</b> | NM_178448 | Homo sapiens chromosome 9 open reading frame 140 (C9orf140), mRNA. [NM_178448]                               | 156 |
| <b>A_01_P002530</b> | NM_024322 | Homo sapiens hypothetical protein MGC11266 (MGC11266), mRNA [NM_024322]                                      | 157 |
| <b>A_01_P017057</b> | NM_138806 | Homo sapiens MOX2 receptor (MOX2R), transcript variant 1, mRNA [NM_138806]                                   | 158 |
| <b>A_01_P013116</b> | NM_004526 | Homo sapiens MCM2 minichromosome maintenance deficient 2, mitotin (S. cerevisiae)                            | 159 |

|                     |              |                                                                                                                                                                            |     |
|---------------------|--------------|----------------------------------------------------------------------------------------------------------------------------------------------------------------------------|-----|
|                     |              | (MCM2), mRNA. [NM_004526]                                                                                                                                                  |     |
| <b>A_01_P005472</b> | NM_053282    | Homo sapiens SH2 domain containing 1B (SH2D1B), mRNA. [NM_053282]                                                                                                          | 160 |
| <b>A_01_P001365</b> | NM_002592    | Homo sapiens proliferating cell nuclear antigen (PCNA), transcript variant 1, mRNA [NM_002592]                                                                             | 161 |
| <b>A_01_P007530</b> | NM_194292    | Homo sapiens spindle assembly abnormal protein 6 (SAS-6), mRNA. [NM_194292]                                                                                                | 162 |
| <b>A_01_P007126</b> | NM_024698    | Homo sapiens solute carrier family 25 (mitochondrial carrier: glutamate), member 22 (SLC25A22), mRNA. [NM_024698]                                                          | 163 |
| <b>A_01_P002884</b> | CO646710     | ILLUMIGEN_MCQ_39534 Katze_MMPB2 Macaca mulatta cDNA clone IBIUW:22979 5' similar to Bases 79 to 930 highly similar to human APOBEC3F (Hs.337667), mRNA sequence [CO646710] | 164 |
| <b>A_01_P014003</b> | NM_031485    | Homo sapiens glutamate-rich WD repeat containing 1 (GRWD1), mRNA. [NM_031485]                                                                                              | 165 |
| <b>A_01_P012523</b> | NM_052821    | Homo sapiens WD repeat domain 5 (WDR5), transcript variant 2, mRNA [NM_052821]                                                                                             | 166 |
| <b>A_01_P006973</b> | NM_018438    | Homo sapiens F-box only protein 6 (FBXO6), mRNA [NM_018438]                                                                                                                | 167 |
| <b>A_01_P001806</b> | NM_003587    | Homo sapiens DEAH (Asp-Glu-Ala-His) box polypeptide 16 (DHX16), mRNA [NM_003587]                                                                                           | 168 |
| <b>A_01_P001968</b> | NM_018132    | Homo sapiens chromosome 6 open reading frame 139 (C6orf139), mRNA. [NM_018132]                                                                                             | 169 |
| <b>A_01_P001434</b> | NM_000097    | Homo sapiens coproporphyrinogen oxidase (CPOX), mRNA [NM_000097]                                                                                                           | 170 |
| <b>A_01_P013620</b> | NM_001005339 | Homo sapiens regulator of G-protein signalling 10 (RGS10), transcript variant 1, mRNA [NM_001005339]                                                                       | 171 |
| <b>A_01_P011046</b> | NM_032048    | Homo sapiens elastin microfibril interfacier 2 (EMILIN2), mRNA [NM_032048]                                                                                                 | 172 |
| <b>A_01_P017254</b> | NM_024309    | Homo sapiens TNFAIP3 interacting protein 2 (TNIP2), mRNA. [NM_024309]                                                                                                      | 173 |
| <b>A_01_P016200</b> | NM_198282    | Homo sapiens hypothetical protein LOC340061 (LOC340061), mRNA. [NM_198282]                                                                                                 | 174 |
| <b>A_01_P009963</b> | NM_032331    | Homo sapiens hypothetical protein MGC2408 (MGC2408), mRNA [NM_032331]                                                                                                      | 175 |
| <b>A_01_P010129</b> | NM_025217    | Homo sapiens UL16 binding protein 2 (ULBP2), mRNA. [NM_025217]                                                                                                             | 176 |
| <b>A_01_P013921</b> | NM_005914    | Homo sapiens MCM4 minichromosome maintenance deficient 4 ( <i>S. cerevisiae</i> ) (MCM4), transcript variant 1, mRNA.                                                      | 177 |

|                     |           |                                                                                                                                   |     |
|---------------------|-----------|-----------------------------------------------------------------------------------------------------------------------------------|-----|
|                     |           | [NM_005914]                                                                                                                       |     |
| <b>A_01_P004381</b> | NM_006142 | Homo sapiens stratifin (SFN), mRNA.<br>[NM_006142]                                                                                | 178 |
| <b>A_01_P015440</b> | NM_203311 | Homo sapiens similar to Taxol resistant associated protein 3 (TRAG-3) (LOC389903), mRNA [NM_203311]                               | 179 |
| <b>A_01_P015824</b> | NM_018204 | Homo sapiens cytoskeleton associated protein 2 (CKAP2), mRNA. [NM_018204]                                                         | 180 |
| <b>A_01_P009604</b> | XR_012476 | PREDICTED: Macaca mulatta hypothetical protein LOC711693 (LOC711693), mRNA [XR_012476]                                            | 181 |
| <b>A_01_P014786</b> | NM_198563 | Homo sapiens Similar to RIKEN cDNA 1810038N08 gene (MGC52022), mRNA. [NM_198563]                                                  | 182 |
| <b>A_01_P000998</b> | NM_016489 | Homo sapiens 5'-nucleotidase, cytosolic III (NT5C3), transcript variant 3, mRNA. [NM_016489]                                      | 183 |
| <b>A_01_P006006</b> | NM_013334 | Homo sapiens GDP-mannose pyrophosphorylase B (GMPPB), transcript variant 1, mRNA [NM_013334]                                      | 184 |
| <b>A_01_P019058</b> | NM_002406 | Homo sapiens mannosyl (alpha-1,3-)-glycoprotein beta-1,2-N-acetylglucosaminyltransferase (MGAT1), mRNA. [NM_002406]               | 185 |
| <b>A_01_P000686</b> | NM_002250 | Homo sapiens potassium intermediate/small conductance calcium-activated channel, subfamily N, member 4 (KCNN4), mRNA. [NM_002250] | 186 |
| <b>A_01_P002633</b> | NM_003594 | Homo sapiens transcription termination factor, RNA polymerase II (TTF2), mRNA. [NM_003594]                                        | 187 |
| <b>A_01_P009125</b> | XR_010550 | PREDICTED: Macaca mulatta WD repeat and HMG-box DNA binding protein 1 (WDHD1), mRNA [XR_010550]                                   | 188 |
| <b>A_01_P006184</b> | NM_002445 | Homo sapiens macrophage scavenger receptor 1 (MSR1), transcript variant SR-AII, mRNA. [NM_002445]                                 | 189 |
| <b>A_01_P016583</b> | NM_003920 | Homo sapiens timeless homolog (Drosophila) (TIMELESS), mRNA [NM_003920]                                                           | 190 |
| <b>A_01_P001297</b> | NM_005461 | Homo sapiens v-maf musculoaponeurotic fibrosarcoma oncogene homolog B (avian) (MAFB), mRNA [NM_005461]                            | 191 |
| <b>A_01_P016718</b> | NM_004111 | Homo sapiens flap structure-specific endonuclease 1 (FEN1), mRNA [NM_004111]                                                      | 192 |
| <b>A_01_P015686</b> | NM_080626 | Homo sapiens BRI3 binding protein (BRI3BP), mRNA [NM_080626]                                                                      | 193 |
| <b>A_01_P012645</b> | NM_021129 | Homo sapiens pyrophosphatase (inorganic) (PP), mRNA [NM_021129]                                                                   | 194 |

|                     |           |                                                                                                                                               |     |
|---------------------|-----------|-----------------------------------------------------------------------------------------------------------------------------------------------|-----|
| <b>A_01_P015552</b> | NM_023930 | Homo sapiens potassium channel tetramerisation domain containing 14 (KCTD14), mRNA [NM_023930]                                                | 195 |
| <b>A_01_P010380</b> | NM_024680 | Homo sapiens E2F transcription factor 8 (E2F8), mRNA. [NM_024680]                                                                             | 196 |
| <b>A_01_P009465</b> | NM_017654 | Homo sapiens sterile alpha motif domain containing 9 (SAMD9), mRNA. [NM_017654]                                                               | 197 |
| <b>A_01_P000668</b> | XR_012726 | PREDICTED: Macaca mulatta similar to ubiquitin-conjugating enzyme E2L 6 isoform 1 (LOC705561), mRNA [XR_012726]                               | 198 |
| <b>A_01_P014951</b> | NM_032148 | Homo sapiens solute carrier family 41, member 2 (SLC41A2), mRNA [NM_032148]                                                                   | 199 |
| <b>A_01_P004909</b> | NM_006678 | Homo sapiens CD300C antigen (CD300C), mRNA. [NM_006678]                                                                                       | 200 |
| <b>A_01_P013244</b> | NM_001085 | Homo sapiens serine (or cysteine) proteinase inhibitor, clade A (alpha-1 antiproteinase, antitrypsin), member 3 (SERPINA3), mRNA. [NM_001085] | 201 |
| <b>A_01_P002897</b> | NM_032782 | Homo sapiens hepatitis A virus cellular receptor 2 (HAVCR2), mRNA. [NM_032782]                                                                | 202 |
| <b>A_01_P010844</b> | NM_172140 | Homo sapiens interleukin 29 (interferon, lambda 1) (IL29), mRNA. [NM_172140]                                                                  | 203 |
| <b>A_01_P003147</b> | NM_016816 | Homo sapiens 2',5'-oligoadenylate synthetase 1, 40/46kDa (OAS1), transcript variant E18, mRNA. [NM_016816]                                    | 204 |
| <b>A_01_P008276</b> | NM_003733 | Homo sapiens 2'-5'-oligoadenylate synthetase-like (OASL), transcript variant 1, mRNA. [NM_003733]                                             | 205 |

**Supplemental Table 5.** Annotation of the fold change of 205 differentially expressed genes (DEG) from the right lower lung of individual animals during MERS-CoV infection in interferon- $\alpha$ 2b and ribavirin treated and untreated animals as determined by Welch's t-test ( $p < 0.01$ , fold change  $\geq 1.5$ ), and grouped by hierarchical clustering.

| Agilent Probe Identifier | Accession Number (RefSeq) | Description                                                                                                                       | Average Treated | Average Untreated | Heatmap order |
|--------------------------|---------------------------|-----------------------------------------------------------------------------------------------------------------------------------|-----------------|-------------------|---------------|
| A_01_P013448             | NM_052913                 | Homo sapiens KIAA1913 (KIAA1913), mRNA [NM_052913]                                                                                | -0.7066         | -0.0133           | 1             |
| A_01_P009604             | XR_012476                 | PREDICTED: Macaca mulatta hypothetical protein LOC711693 (LOC711693), mRNA [XR_012476]                                            | -0.6796         | -0.0128           | 2             |
| A_01_P010380             | NM_024680                 | Homo sapiens E2F transcription factor 8 (E2F8), mRNA. [NM_024680]                                                                 | -0.6145         | -0.0072           | 3             |
| A_01_P016005             | NM_006500                 | Homo sapiens melanoma cell adhesion molecule (MCAM), mRNA. [NM_006500]                                                            | -0.5394         | -0.0048           | 4             |
| A_01_P004381             | NM_006142                 | Homo sapiens stratifin (SFN), mRNA. [NM_006142]                                                                                   | -0.4943         | -0.0035           | 5             |
| A_01_P010844             | NM_172140                 | Homo sapiens interleukin 29 (interferon, lambda 1) (IL29), mRNA. [NM_172140]                                                      | -0.5134         | -0.0133           | 6             |
| A_01_P015824             | NM_018204                 | Homo sapiens cytoskeleton associated protein 2 (CKAP2), mRNA. [NM_018204]                                                         | -0.4927         | -0.0108           | 7             |
| A_01_P014859             | NM_031452                 | Homo sapiens chromosome 6 open reading frame 119 (C6orf119), mRNA [NM_031452]                                                     | -0.4332         | -0.0035           | 8             |
| A_01_P013348             | NM_031452                 | Homo sapiens chromosome 6 open reading frame 119 (C6orf119), mRNA [NM_031452]                                                     | -0.4074         | -0.0051           | 9             |
| A_01_P013921             | NM_005914                 | Homo sapiens MCM4 minichromosome maintenance deficient 4 ( <i>S. cerevisiae</i> ) (MCM4), transcript variant 1, mRNA. [NM_005914] | -0.4114         | -0.0033           | 10            |
| A_01_P006184             | NM_002445                 | Homo sapiens macrophage scavenger receptor 1 (MSR1), transcript variant SR-AII, mRNA. [NM_002445]                                 | -0.4172         | -0.0012           | 11            |
| A_01_P016718             | NM_004111                 | Homo sapiens flap structure-specific endonuclease 1 (FEN1), mRNA [NM_004111]                                                      | -0.4043         | -0.0068           | 12            |
| A_01_P015686             | NM_080626                 | Homo sapiens BRI3 binding protein (BRI3BP), mRNA [NM_080626]                                                                      | -0.3991         | -0.0044           | 13            |
| A_01_P010018             | NM_144675                 | Homo sapiens hypothetical protein MGC18079 (MGC18079), mRNA [NM_144675]                                                           | -0.4207         | -0.0034           | 14            |

|              |           |                                                                                                                                                                 |         |         |    |
|--------------|-----------|-----------------------------------------------------------------------------------------------------------------------------------------------------------------|---------|---------|----|
| A_01_P011284 | NM_004153 | Homo sapiens origin recognition complex, subunit 1-like (yeast) (ORC1L), mRNA [NM_004153]                                                                       | -0.4111 | -0.0036 | 15 |
| A_01_P019557 | NM_005627 | Homo sapiens serum/glucocorticoid regulated kinase (SGK), mRNA [NM_005627]                                                                                      | -0.3832 | -0.0061 | 16 |
| A_01_P002897 | NM_032782 | Homo sapiens hepatitis A virus cellular receptor 2 (HAVCR2), mRNA. [NM_032782]                                                                                  | -0.4007 | -0.0066 | 17 |
| A_01_P000722 | NM_198321 | Homo sapiens UDP-N-acetyl-alpha-D-galactosamine:polypeptide N-acetylgalactosaminyltransferase 10 (GalNAc-T10) (GALNT10), transcript variant 1, mRNA [NM_198321] | -0.3898 | -0.0048 | 18 |
| A_01_P010378 | NM_153615 | Homo sapiens Ral-GDS related protein Rgr (Rgr), mRNA. [NM_153615]                                                                                               | -0.3821 | -0.0081 | 19 |
| A_01_P001601 | NM_017662 | Homo sapiens transient receptor potential cation channel, subfamily M, member 6 (TRPM6), mRNA [NM_017662]                                                       | -0.3662 | -0.0024 | 20 |
| A_01_P019415 | NM_001384 | Homo sapiens DPH2-like 2 (S. cerevisiae) (DPH2L2), transcript variant 1, mRNA [NM_001384]                                                                       | -0.3471 | -0.0019 | 21 |
| A_01_P007530 | NM_194292 | Homo sapiens spindle assembly abnormal protein 6 (SAS-6), mRNA. [NM_194292]                                                                                     | -0.3254 | -0.0011 | 22 |
| A_01_P012645 | NM_021129 | Homo sapiens pyrophosphatase (inorganic) (PP), mRNA [NM_021129]                                                                                                 | -0.3882 | -0.0029 | 23 |
| A_01_P015440 | NM_203311 | Homo sapiens similar to Taxol resistant associated protein 3 (TRAG-3) (LOC389903), mRNA [NM_203311]                                                             | -0.3659 | -0.0036 | 24 |
| A_01_P001297 | NM_005461 | Homo sapiens v-maf musculoaponeurotic fibrosarcoma oncogene homolog B (avian) (MAFB), mRNA [NM_005461]                                                          | -0.3656 | -0.0021 | 25 |
| A_01_P018984 | XR_013586 | PREDICTED: Macaca mulatta similar to Protein C7orf19 (LOC715014), mRNA [XR_013586]                                                                              | -0.3871 | -0.0011 | 26 |
| A_01_P008276 | NM_003733 | Homo sapiens 2'-5'-oligoadenylate synthetase-like (OASL), transcript variant 1, mRNA. [NM_003733]                                                               | -0.3789 | -0.0019 | 27 |
| A_01_P007125 | NM_001905 | Homo sapiens CTP synthase (CTPS), mRNA. [NM_001905]                                                                                                             | -0.3537 | -0.0047 | 28 |
| A_01_P016934 | NM_000247 | Homo sapiens MHC class I polypeptide-related sequence A (MICA), mRNA. [NM_000247]                                                                               | -0.3564 | -0.0002 | 29 |
| A_01_P010051 | NM_033084 | Homo sapiens Fanconi anemia, complementation group D2 (FANCD2), mRNA [NM_033084]                                                                                | -0.3429 | -0.0029 | 30 |
| A_01_P016583 | NM_003920 | Homo sapiens timeless homolog (Drosophila) (TIMELESS), mRNA                                                                                                     | -0.3622 | -0.0025 | 31 |

|              |           |                                                                                                                       |         |         |    |
|--------------|-----------|-----------------------------------------------------------------------------------------------------------------------|---------|---------|----|
|              |           | [NM_003920]                                                                                                           |         |         |    |
| A_01_P004909 | NM_006678 | Homo sapiens CD300C antigen (CD300C), mRNA. [NM_006678]                                                               | -0.3483 | -0.0020 | 32 |
| A_01_P010205 | NM_212479 | Homo sapiens zinc finger, MYND domain containing 11 (ZMYND11), transcript variant 2, mRNA [NM_212479]                 | -0.3313 | -0.0023 | 33 |
| A_01_P006066 | NM_000480 | Homo sapiens adenosine monophosphate deaminase (isoform E) (AMPD3), transcript variant 1, mRNA. [NM_000480]           | -0.3297 | -0.0055 | 34 |
| A_01_P004185 | NM_032590 | Homo sapiens F-box and leucine-rich repeat protein 10 (FBXL10), mRNA [NM_032590]                                      | -0.3190 | -0.0035 | 35 |
| A_01_P013795 | NM_005348 | Homo sapiens heat shock 90kDa protein 1, alpha (HSPCA), mRNA [NM_005348]                                              | -0.3018 | -0.0039 | 36 |
| A_01_P009465 | NM_017654 | Homo sapiens sterile alpha motif domain containing 9 (SAMD9), mRNA. [NM_017654]                                       | -0.3300 | -0.0034 | 37 |
| A_01_P013116 | NM_004526 | Homo sapiens MCM2 minichromosome maintenance deficient 2, mitotic (S. cerevisiae) (MCM2), mRNA. [NM_004526]           | -0.2967 | -0.0039 | 38 |
| A_01_P001001 | NM_003038 | Homo sapiens solute carrier family 1 (glutamate/neutral amino acid transporter), member 4 (SLC1A4), mRNA. [NM_003038] | -0.2995 | -0.0016 | 39 |
| A_01_P010129 | NM_025217 | Homo sapiens UL16 binding protein 2 (ULBP2), mRNA. [NM_025217]                                                        | -0.3377 | -0.0050 | 40 |
| A_01_P005472 | NM_053282 | Homo sapiens SH2 domain containing 1B (SH2D1B), mRNA. [NM_053282]                                                     | -0.3256 | -0.0059 | 41 |
| A_01_P007126 | NM_024698 | Homo sapiens solute carrier family 25 (mitochondrial carrier: glutamate), member 22 (SLC25A22), mRNA. [NM_024698]     | -0.3198 | -0.0004 | 42 |
| A_01_P001970 | NM_178448 | Homo sapiens chromosome 9 open reading frame 140 (C9orf140), mRNA. [NM_178448]                                        | -0.3005 | -0.0011 | 43 |
| A_01_P015552 | NM_023930 | Homo sapiens potassium channel tetramerisation domain containing 14 (KCTD14), mRNA [NM_023930]                        | -0.2808 | -0.0018 | 44 |
| A_01_P017057 | NM_138806 | Homo sapiens MOX2 receptor (MOX2R), transcript variant 1, mRNA [NM_138806]                                            | -0.3154 | -0.0019 | 45 |
| A_01_P015605 | XR_011110 | PREDICTED: Macaca mulatta zinc finger, DHHC domain containing 9 (ZDHHC9), mRNA [XR_011110]                            | -0.3080 | -0.0043 | 46 |
| A_01_P001365 | NM_002592 | Homo sapiens proliferating cell nuclear antigen (PCNA), transcript variant 1,                                         | -0.3034 | -0.0043 | 47 |

|              |           | mRNA [NM_002592]                                                                                                                                        |         |         |    |
|--------------|-----------|---------------------------------------------------------------------------------------------------------------------------------------------------------|---------|---------|----|
| A_01_P007301 | NM_014446 | Homo sapiens integrin beta 1 binding protein 3 (ITGB1BP3), mRNA. [NM_014446]                                                                            | -0.3027 | -0.0048 | 48 |
| A_01_P010142 | NM_005444 | Homo sapiens RCD1 required for cell differentiation1 homolog (S. pombe) (RQCD1), mRNA [NM_005444]                                                       | -0.2984 | -0.0049 | 49 |
| A_01_P016243 | NM_000383 | Homo sapiens autoimmune regulator (autoimmune polyendocrinopathy candidiasis ectodermal dystrophy) (AIRE), transcript variant AIRE-1, mRNA. [NM_000383] | -0.2975 | -0.0036 | 50 |
| A_01_P004865 | NM_018369 | Homo sapiens DEP domain containing 1B (DEPDC1B), mRNA [NM_018369]                                                                                       | -0.2948 | -0.0016 | 51 |
| A_01_P002530 | NM_024322 | Homo sapiens hypothetical protein MGC11266 (MGC11266), mRNA [NM_024322]                                                                                 | -0.2780 | -0.0027 | 52 |
| A_01_P005221 | NM_025250 | Homo sapiens tweety homolog 3 (Drosophila) (TTYH3), mRNA. [NM_025250]                                                                                   | -0.2821 | -0.0037 | 53 |
| A_01_P009624 | NM_005441 | Homo sapiens chromatin assembly factor 1, subunit B (p60) (CHAF1B), mRNA [NM_005441]                                                                    | -0.2715 | -0.0025 | 54 |
| A_01_P015055 | NM_005810 | Homo sapiens killer cell lectin-like receptor subfamily G, member 1 (KLRG1), mRNA. [NM_005810]                                                          | -0.2677 | -0.0017 | 55 |
| A_01_P009315 | NM_015179 | Homo sapiens KIAA0690 (KIAA0690), mRNA. [NM_015179]                                                                                                     | -0.2713 | -0.0029 | 56 |
| A_01_P014951 | NM_032148 | Homo sapiens solute carrier family 41, member 2 (SLC41A2), mRNA [NM_032148]                                                                             | -0.2575 | -0.0035 | 57 |
| A_01_P008639 | XR_012838 | PREDICTED: Macaca mulatta similar to activating transcription factor 7 interacting protein 2 (LOC710224), mRNA [XR_012838]                              | -0.2566 | -0.0004 | 58 |
| A_01_P019374 | NM_004219 | Homo sapiens pituitary tumor-transforming 1 (PTTG1), mRNA [NM_004219]                                                                                   | -0.2389 | -0.0019 | 59 |
| A_01_P017254 | NM_024309 | Homo sapiens TNFAIP3 interacting protein 2 (TNIP2), mRNA. [NM_024309]                                                                                   | -0.2639 | -0.0022 | 60 |
| A_01_P018173 | NM_001069 | Homo sapiens tubulin, beta polypeptide (TUBB), mRNA [NM_001069]                                                                                         | -0.2620 | -0.0001 | 61 |
| A_01_P013112 | NM_018130 | Homo sapiens SHQ1 homolog (S. cerevisiae) (SHQ1), mRNA. [NM_018130]                                                                                     | -0.2611 | 0.0000  | 62 |
| A_01_P016495 | NM_006938 | Homo sapiens small nuclear ribonucleoprotein D1 polypeptide 16kDa (SNRPD1), mRNA. [NM_006938]                                                           | -0.2524 | -0.0028 | 63 |
| A_01_P009963 | NM_032331 | Homo sapiens hypothetical protein                                                                                                                       | -0.2534 | -0.0036 | 64 |



|              |           |                                                                                                                                                                                  |         |         |    |
|--------------|-----------|----------------------------------------------------------------------------------------------------------------------------------------------------------------------------------|---------|---------|----|
|              |           | MGC2408 (MGC2408), mRNA<br>[NM_032331]                                                                                                                                           |         |         |    |
| A_01_P009125 | XR_010550 | PREDICTED: Macaca mulatta WD repeat and HMG-box DNA binding protein 1 (WDHD1), mRNA [XR_010550]                                                                                  | -0.2666 | -0.0019 | 65 |
| A_01_P006705 | NM_032822 | Homo sapiens hypothetical protein FLJ14668 (FLJ14668), mRNA [NM_032822]                                                                                                          | -0.2579 | -0.0016 | 66 |
| A_01_P017505 | XR_010563 | PREDICTED: Macaca mulatta similar to Securin (Pituitary tumor-transforming protein 1) (Tumor transforming protein 1) (Esp1-associated protein) (hPTTG) (PTTG1), mRNA [XR_010563] | -0.2500 | -0.0012 | 67 |
| A_01_P002633 | NM_003594 | Homo sapiens transcription termination factor, RNA polymerase II (TTF2), mRNA. [NM_003594]                                                                                       | -0.2377 | -0.0020 | 68 |
| A_01_P010440 | NM_032869 | Homo sapiens NudC domain containing 1 (NUDCD1), mRNA. [NM_032869]                                                                                                                | -0.2356 | -0.0013 | 69 |
| A_01_P002804 | NM_003463 | Homo sapiens protein tyrosine phosphatase type IVA, member 1 (PTP4A1), mRNA. [NM_003463]                                                                                         | -0.2320 | -0.0001 | 70 |
| A_01_P011637 | NM_001069 | Homo sapiens tubulin, beta polypeptide (TUBB), mRNA [NM_001069]                                                                                                                  | -0.2406 | 0.0000  | 71 |
| A_01_P019058 | NM_002406 | Homo sapiens mannosyl (alpha-1,3-)-glycoprotein beta-1,2-N-acetylglucosaminyltransferase (MGAT1), mRNA. [NM_002406]                                                              | -0.2261 | -0.0005 | 72 |
| A_01_P014003 | NM_031485 | Homo sapiens glutamate-rich WD repeat containing 1 (GRWD1), mRNA. [NM_031485]                                                                                                    | -0.2298 | -0.0016 | 73 |
| A_01_P016853 | NM_017837 | Homo sapiens phosphatidylinositol glycan, class V (PIGV), mRNA. [NM_017837]                                                                                                      | -0.2204 | -0.0022 | 74 |
| A_01_P006973 | NM_018438 | Homo sapiens F-box only protein 6 (FBXO6), mRNA [NM_018438]                                                                                                                      | -0.2120 | -0.0003 | 75 |
| A_01_P009978 | NM_002342 | Homo sapiens lymphotoxin beta receptor (TNFR superfamily, member 3) (LTBR), mRNA. [NM_002342]                                                                                    | -0.2102 | 0.0000  | 76 |
| A_01_P013231 | NM_015531 | Homo sapiens DKFZP586P0123 protein (DKFZP586P0123), mRNA. [NM_015531]                                                                                                            | -0.2139 | -0.0023 | 77 |
| A_01_P003619 | NM_015425 | Homo sapiens polymerase (RNA) I polypeptide A, 194kDa (POLR1A), mRNA [NM_015425]                                                                                                 | -0.2179 | -0.0002 | 78 |
| A_01_P012523 | NM_052821 | Homo sapiens WD repeat domain 5 (WDR5), transcript variant 2, mRNA [NM_052821]                                                                                                   | -0.2097 | -0.0010 | 79 |
| A_01_P013342 | NM_024098 | Homo sapiens hypothetical protein MGC2574 (MGC2574), mRNA [NM_024098]                                                                                                            | -0.2090 | -0.0006 | 80 |

|              |           |                                                                                                                                                                                |         |         |    |
|--------------|-----------|--------------------------------------------------------------------------------------------------------------------------------------------------------------------------------|---------|---------|----|
| A_01_P016846 | NM_014777 | Homo sapiens KIAA0133 (KIAA0133), mRNA. [NM_014777]                                                                                                                            | -0.2126 | -0.0006 | 81 |
| A_01_P019486 | NM_024096 | Homo sapiens XTP3-transactivated protein A (XTP3TPA), mRNA. [NM_024096]                                                                                                        | -0.2053 | -0.0006 | 82 |
| A_01_P006714 | NM_006638 | Homo sapiens ribonuclease P 40kDa subunit (RPP40), mRNA [NM_006638]                                                                                                            | -0.1999 | -0.0011 | 83 |
| A_01_P017065 | NM_014473 | Homo sapiens dimethyladenosine transferase (HSA9761), mRNA. [NM_014473]                                                                                                        | -0.1900 | -0.0013 | 84 |
| A_01_P001694 | NM_017437 | Homo sapiens cleavage and polyadenylation specific factor 2, 100kDa (CPSF2), mRNA [NM_017437]                                                                                  | -0.1940 | -0.0004 | 85 |
| A_01_P017815 | NM_032175 | Homo sapiens hypothetical protein FLJ12787 (FLJ12787), mRNA [NM_032175]                                                                                                        | -0.1912 | -0.0015 | 86 |
| A_01_P008218 | NM_003751 | Homo sapiens eukaryotic translation initiation factor 3, subunit 9 eta, 116kDa (EIF3S9), transcript variant 1, mRNA [NM_003751]                                                | -0.1829 | -0.0002 | 87 |
| A_01_P006095 | XR_011934 | PREDICTED: Macaca mulatta DnaJ (Hsp40) homolog, subfamily A, member 3 (DNAJA3), mRNA [XR_011934]                                                                               | -0.1822 | -0.0018 | 88 |
| A_01_P017868 | NM_006170 | Homo sapiens nucleolar protein 1, 120kDa (NOL1), mRNA. [NM_006170]                                                                                                             | -0.1908 | -0.0005 | 89 |
| A_01_P001806 | NM_003587 | Homo sapiens DEAH (Asp-Glu-Ala-His) box polypeptide 16 (DHX16), mRNA [NM_003587]                                                                                               | -0.1817 | -0.0004 | 90 |
| A_01_P003118 | NM_002014 | Homo sapiens FK506 binding protein 4, 59kDa (FKBP4), mRNA [NM_002014]                                                                                                          | -0.2219 | -0.0009 | 91 |
| A_01_P017440 | NM_016936 | Homo sapiens ubinuclein 1 (UBN1), mRNA. [NM_016936]                                                                                                                            | -0.2212 | -0.0020 | 92 |
| A_01_P019887 | NM_001303 | Homo sapiens COX10 homolog, cytochrome c oxidase assembly protein, heme A: farnesyltransferase (yeast) (COX10), nuclear gene encoding mitochondrial protein, mRNA. [NM_001303] | -0.2123 | -0.0004 | 93 |
| A_01_P001688 | NM_001090 | Homo sapiens ATP-binding cassette, sub-family F (GCN20), member 1 (ABCF1), transcript variant 2, mRNA. [NM_001090]                                                             | -0.2032 | -0.0016 | 94 |
| A_01_P005748 | NM_032476 | Homo sapiens mitochondrial ribosomal protein S6 (MRPS6), nuclear gene encoding mitochondrial protein, mRNA. [NM_032476]                                                        | -0.1945 | -0.0020 | 95 |
| A_01_P000686 | NM_002250 | Homo sapiens potassium intermediate/small conductance calcium-activated channel, subfamily N, member 4 (KCNN4), mRNA. [NM_002250]                                              | -0.1901 | -0.0008 | 96 |

|              |           |                                                                                                                                          |         |         |     |
|--------------|-----------|------------------------------------------------------------------------------------------------------------------------------------------|---------|---------|-----|
| A_01_P000668 | XR_012726 | PREDICTED: <i>Macaca mulatta</i> similar to ubiquitin-conjugating enzyme E2L 6 isoform 1 (LOC705561), mRNA [XR_012726]                   | -0.2633 | -0.0007 | 97  |
| A_01_P006029 | NM_138395 | <i>Homo sapiens</i> methionine-tRNA synthetase 2 (mitochondrial) (MARS2), nuclear gene encoding mitochondrial protein, mRNA. [NM_138395] | -0.2578 | -0.0015 | 98  |
| A_01_P016200 | NM_198282 | <i>Homo sapiens</i> hypothetical protein LOC340061 (LOC340061), mRNA. [NM_198282]                                                        | -0.2479 | -0.0010 | 99  |
| A_01_P013107 | NM_024708 | <i>Homo sapiens</i> ankyrin repeat and SOCS box-containing 7 (ASB7), transcript variant 1, mRNA [NM_024708]                              | -0.2453 | -0.0002 | 100 |
| A_01_P006006 | NM_013334 | <i>Homo sapiens</i> GDP-mannose pyrophosphorylase B (GMPPB), transcript variant 1, mRNA [NM_013334]                                      | -0.2327 | -0.0010 | 101 |
| A_01_P003147 | NM_016816 | <i>Homo sapiens</i> 2',5'-oligoadenylate synthetase 1, 40/46kDa (OAS1), transcript variant E18, mRNA. [NM_016816]                        | -0.2534 | -0.0019 | 102 |
| A_01_P007655 | NM_177435 | <i>Homo sapiens</i> peroxisome proliferative activated receptor, delta (PPARD), transcript variant 2, mRNA. [NM_177435]                  | -0.2280 | -0.0014 | 103 |
| A_01_P013026 | NM_032656 | <i>Homo sapiens</i> DEAH (Asp-Glu-Ala-His) box polypeptide 37 (DHX37), mRNA. [NM_032656]                                                 | -0.2308 | -0.0014 | 104 |
| A_01_P004130 | NM_024923 | <i>Homo sapiens</i> nucleoporin 210kDa (NUP210), mRNA. [NM_024923]                                                                       | -0.2214 | -0.0018 | 105 |
| A_01_P006249 | NM_016955 | <i>Homo sapiens</i> soluble liver antigen/liver pancreas antigen (SLA/LP), mRNA [NM_016955]                                              | -0.2342 | -0.0015 | 106 |
| A_01_P018687 | NM_005239 | <i>Homo sapiens</i> v-ets erythroblastosis virus E26 oncogene homolog 2 (avian) (ETS2), mRNA. [NM_005239]                                | -0.2283 | -0.0005 | 107 |
| A_01_P019627 | NM_016138 | <i>Homo sapiens</i> coenzyme Q7 homolog, ubiquinone (yeast) (COQ7), mRNA. [NM_016138]                                                    | -0.2152 | -0.0009 | 108 |
| A_01_P010690 | NM_012177 | <i>Homo sapiens</i> F-box protein 5 (FBXO5), mRNA. [NM_012177]                                                                           | -0.2354 | -0.0012 | 109 |
| A_01_P011046 | NM_032048 | <i>Homo sapiens</i> elastin microfibril interfacer 2 (EMILIN2), mRNA [NM_032048]                                                         | -0.2215 | -0.0027 | 110 |
| A_01_P001869 | NM_012453 | <i>Homo sapiens</i> transducin (beta)-like 2 (TBL2), transcript variant 1, mRNA. [NM_012453]                                             | -0.2192 | -0.0007 | 111 |
| A_01_P013636 | XR_009709 | PREDICTED: <i>Macaca mulatta</i> hypothetical protein LOC693502 (LOC693502), mRNA [XR_009709]                                            | -0.2169 | -0.0006 | 112 |

|              |              |                                                                                                                                                                                   |         |         |     |
|--------------|--------------|-----------------------------------------------------------------------------------------------------------------------------------------------------------------------------------|---------|---------|-----|
| A_01_P007529 | XR_013160    | PREDICTED: <i>Macaca mulatta</i> similar to tubulin, beta polypeptide 4, member Q (LOC708952), mRNA [XR_013160]                                                                   | -0.2131 | -0.0001 | 113 |
| A_01_P009025 | NM_006352    | <i>Homo sapiens</i> zinc finger protein 238 (ZNF238), transcript variant 2, mRNA [NM_006352]                                                                                      | -0.2155 | -0.0006 | 114 |
| A_01_P017493 | XR_013160    | PREDICTED: <i>Macaca mulatta</i> similar to tubulin, beta polypeptide 4, member Q (LOC708952), mRNA [XR_013160]                                                                   | -0.2106 | -0.0001 | 115 |
| A_01_P014085 | XR_014668    | PREDICTED: <i>Macaca mulatta</i> similar to chromatin assembly factor 1, subunit A (p150) (LOC721861), mRNA [XR_014668]                                                           | -0.2353 | -0.0024 | 116 |
| A_01_P007235 | NM_032830    | <i>Homo sapiens</i> cirrhosis, autosomal recessive 1A (cirhin) (CIRH1A), mRNA [NM_032830]                                                                                         | -0.2274 | -0.0025 | 117 |
| A_01_P014049 | NM_014503    | <i>Homo sapiens</i> down-regulated in metastasis (DRIM), mRNA. [NM_014503]                                                                                                        | -0.2205 | -0.0003 | 118 |
| A_01_P002884 | CO646710     | ILLUMIGEN_MCQ_39534 Katze_MMPB2 <i>Macaca mulatta</i> cDNA clone IBIUW:22979 5' similar to Bases 79 to 930 highly similar to human APOBEC3F (Hs.337667), mRNA sequence [CO646710] | -0.2197 | -0.0004 | 119 |
| A_01_P014786 | NM_198563    | <i>Homo sapiens</i> Similar to RIKEN cDNA 1810038N08 gene (MGC52022), mRNA. [NM_198563]                                                                                           | -0.2149 | -0.0005 | 120 |
| A_01_P000998 | NM_016489    | <i>Homo sapiens</i> 5'-nucleotidase, cytosolic III (NT5C3), transcript variant 3, mRNA. [NM_016489]                                                                               | -0.2114 | -0.0004 | 121 |
| A_01_P019909 | NM_017813    | <i>Homo sapiens</i> hypothetical protein FLJ20421 (FLJ20421), mRNA [NM_017813]                                                                                                    | -0.2141 | -0.0004 | 122 |
| A_01_P005178 | NM_022470    | <i>Homo sapiens</i> p53 target zinc finger protein (WIG1), transcript variant 1, mRNA [NM_022470]                                                                                 | -0.2078 | -0.0002 | 123 |
| A_01_P017208 | NM_022470    | <i>Homo sapiens</i> p53 target zinc finger protein (WIG1), transcript variant 1, mRNA [NM_022470]                                                                                 | -0.2026 | -0.0001 | 124 |
| A_01_P015413 | NM_003929    | <i>Homo sapiens</i> RAB7, member RAS oncogene family-like 1 (RAB7L1), mRNA. [NM_003929]                                                                                           | -0.2032 | -0.0013 | 125 |
| A_01_P006652 | NM_001001132 | <i>Homo sapiens</i> intersectin 1 (SH3 domain protein) (ITSN1), transcript variant 2, mRNA [NM_001001132]                                                                         | -0.2014 | -0.0007 | 126 |
| A_01_P006726 | NM_007355    | <i>Homo sapiens</i> heat shock 90kDa protein 1, beta (HSPCB), mRNA [NM_007355]                                                                                                    | -0.2000 | -0.0014 | 127 |
| A_01_P015483 | NM_213636    | <i>Homo sapiens</i> PDZ and LIM domain 7 (enigma) (PDLIM7), transcript variant 4, mRNA [NM_213636]                                                                                | -0.1912 | -0.0015 | 128 |

|              |              |                                                                                                                     |         |         |     |
|--------------|--------------|---------------------------------------------------------------------------------------------------------------------|---------|---------|-----|
| A_01_P001434 | NM_000097    | Homo sapiens coproporphyrinogen oxidase (CPOX), mRNA [NM_000097]                                                    | -0.1973 | -0.0016 | 129 |
| A_01_P018559 | NM_144652    | Homo sapiens leucine zipper-EF-hand containing transmembrane protein 2 (LETM2), mRNA. [NM_144652]                   | -0.1936 | -0.0003 | 130 |
| A_01_P013620 | NM_001005339 | Homo sapiens regulator of G-protein signalling 10 (RGS10), transcript variant 1, mRNA [NM_001005339]                | -0.1921 | -0.0016 | 131 |
| A_01_P019654 | NM_152342    | Homo sapiens chromodomain protein, Y-like 2 (CDYL2), mRNA [NM_152342]                                               | -0.1891 | -0.0019 | 132 |
| A_01_P013066 | NM_021204    | Homo sapiens E-1 enzyme (MASA), mRNA. [NM_021204]                                                                   | -0.1865 | -0.0011 | 133 |
| A_01_P016006 | NM_181671    | Homo sapiens phosphatidylinositol transfer protein, cytoplasmic 1 (PITPNC1), transcript variant 2, mRNA [NM_181671] | -0.1910 | -0.0019 | 134 |
| A_01_P015247 | NM_003818    | Homo sapiens CDP-diacylglycerol synthase (phosphatidate cytidyltransferase) 2 (CDS2), mRNA [NM_003818]              | -0.1881 | -0.0008 | 135 |
| A_01_P010568 | NM_005827    | Homo sapiens solute carrier family 35, member B1 (SLC35B1), mRNA [NM_005827]                                        | -0.1919 | -0.0006 | 136 |
| A_01_P015983 | NM_001004346 | Homo sapiens methylenetetrahydrofolate dehydrogenase (NADP+ dependent) 2-like (MTHFD2L), mRNA. [NM_001004346]       | -0.1901 | -0.0003 | 137 |
| A_01_P017707 | NM_153704    | Homo sapiens hypothetical protein MGC26979 (MGC26979), mRNA [NM_153704]                                             | -0.1812 | -0.0010 | 138 |
| A_01_P009126 | NM_032704    | Homo sapiens tubulin alpha 6 (TUBA6), mRNA [NM_032704]                                                              | -0.1851 | -0.0006 | 139 |
| A_01_P009239 | NM_153702    | Homo sapiens hypothetical protein MGC10084 (MGC10084), mRNA [NM_153702]                                             | -0.1774 | -0.0013 | 140 |
| A_01_P010182 | NM_000946    | Homo sapiens primase, polypeptide 1, 49kDa (PRIM1), mRNA. [NM_000946]                                               | -0.1766 | -0.0003 | 141 |
| A_01_P011070 | NM_012111    | Homo sapiens AHA1, activator of heat shock 90kDa protein ATPase homolog 1 (yeast) (AHSA1), mRNA. [NM_012111]        | -0.2046 | -0.0006 | 142 |
| A_01_P001968 | NM_018132    | Homo sapiens chromosome 6 open reading frame 139 (C6orf139), mRNA. [NM_018132]                                      | -0.1992 | -0.0015 | 143 |
| A_01_P007128 | NM_207475    | Homo sapiens FLJ90680 protein (FLJ90680), mRNA. [NM_207475]                                                         | -0.1773 | 0.0000  | 144 |
| A_01_P010687 | NM_001007278 | Homo sapiens ret finger protein 2 (RFP2), transcript variant 4, mRNA. [NM_001007278]                                | 0.1753  | -0.0009 | 145 |
| A_01_P019891 | CO725485     | ILLUMIGEN_MCQ_35171<br>Katze_MMPL Macaca mulatta cDNA                                                               | 0.1804  | -0.0007 | 146 |

|              |           |                                                                                                                                                                         |        |         |     |
|--------------|-----------|-------------------------------------------------------------------------------------------------------------------------------------------------------------------------|--------|---------|-----|
|              |           | clone IBIUW:26108 5' similar to Bases 1 to 543 highly similar to human PPP1R14A (Hs.348037), mRNA sequence [CO725485]                                                   |        |         |     |
| A_01_P014996 | CN641686  | ILLUMIGEN_MCQ_5182<br>Katze_MMBR Macaca mulatta cDNA clone IBIUW:5989 5' similar to Bases 11 to 612 highly similar to human Unigene Hs.445038, mRNA sequence [CN641686] | 0.1750 | -0.0010 | 147 |
| A_01_P002642 | NM_182975 | Homo sapiens hypothetical protein FLJ20403 (FLJ20403), transcript variant 3, mRNA [NM_182975]                                                                           | 0.1811 | -0.0004 | 148 |
| A_01_P001327 | NM_000193 | Homo sapiens sonic hedgehog homolog (Drosophila) (SHH), mRNA [NM_000193]                                                                                                | 0.1782 | -0.0019 | 149 |
| A_01_P007931 | NM_014555 | Homo sapiens transient receptor potential cation channel, subfamily M, member 5 (TRPM5), mRNA. [NM_014555]                                                              | 0.1820 | -0.0006 | 150 |
| A_01_P014672 | NM_145201 | Homo sapiens similar to CG3714 gene product (PP3856), mRNA. [NM_145201]                                                                                                 | 0.1881 | -0.0009 | 151 |
| A_01_P009995 | NM_017514 | Homo sapiens plexin A3 (PLXNA3), mRNA [NM_017514]                                                                                                                       | 0.1891 | -0.0018 | 152 |
| A_01_P013869 | NM_183242 | Homo sapiens BTB (POZ) domain containing 8 (BTBD8), mRNA [NM_183242]                                                                                                    | 0.1907 | -0.0014 | 153 |
| A_01_P000010 | NM_001298 | Homo sapiens cyclic nucleotide gated channel alpha 3 (CNGA3), mRNA. [NM_001298]                                                                                         | 0.1949 | -0.0012 | 154 |
| A_01_P000586 | NM_006715 | Homo sapiens mannosidase, alpha, class 2C, member 1 (MAN2C1), mRNA [NM_006715]                                                                                          | 0.2128 | -0.0023 | 155 |
| A_01_P014052 | XR_011148 | PREDICTED: Macaca mulatta similar to CG8841-PA, isoform A (LOC699954), mRNA [XR_011148]                                                                                 | 0.1918 | -0.0019 | 156 |
| A_01_P000976 | XR_010623 | PREDICTED: Macaca mulatta SET binding protein 1 (SETBP1), mRNA [XR_010623]                                                                                              | 0.1876 | -0.0019 | 157 |
| A_01_P019047 | CO645097  | ILLUMIGEN_MCQ_7508<br>Katze_MMBR Macaca mulatta cDNA clone IBIUW:22673 5' similar to Bases 1 to 285 highly similar to human BTEB1 (Hs.150557), mRNA sequence [CO645097] | 0.1975 | -0.0007 | 158 |
| A_01_P008164 | CN644139  | ILLUMIGEN_MCQ_9651<br>Katze_MMBR Macaca mulatta cDNA clone IBIUW:8946 5' similar to Bases 3 to 316 highly similar to human RAMP1 (Hs.32989), mRNA sequence              | 0.2014 | -0.0024 | 159 |

|              |              |                                                                                                                 |        |         |     |
|--------------|--------------|-----------------------------------------------------------------------------------------------------------------|--------|---------|-----|
|              |              | [CN644139]                                                                                                      |        |         |     |
| A_01_P014631 | NM_182633    | Homo sapiens hypothetical protein FLJ39963 (FLJ39963), mRNA [NM_182633]                                         | 0.2036 | -0.0018 | 160 |
| A_01_P013583 | NM_173197    | Homo sapiens Kv channel interacting protein 2 (KCNIP2), transcript variant 7, mRNA [NM_173197]                  | 0.1953 | -0.0013 | 161 |
| A_01_P010032 | XR_013358    | PREDICTED: Macaca mulatta similar to Calretinin (CR) (LOC708409), mRNA [XR_013358]                              | 0.1973 | -0.0018 | 162 |
| A_01_P013463 | NM_013333    | Homo sapiens epsin 1 (EPN1), mRNA [NM_013333]                                                                   | 0.2012 | -0.0022 | 163 |
| A_01_P000341 | NM_003466    | Homo sapiens paired box gene 8 (PAX8), transcript variant PAX8A, mRNA [NM_003466]                               | 0.2161 | -0.0017 | 164 |
| A_01_P019934 | NM_198085    | Homo sapiens ring finger protein 148 (RNF148), mRNA. [NM_198085]                                                | 0.2303 | -0.0008 | 165 |
| A_01_P017541 | NM_018179    | Homo sapiens activating transcription factor 7 interacting protein (ATF7IP), mRNA [NM_018179]                   | 0.2450 | -0.0017 | 166 |
| A_01_P018522 | NM_018257    | Homo sapiens chromosome 20 open reading frame 36 (C20orf36), mRNA [NM_018257]                                   | 0.2228 | -0.0026 | 167 |
| A_01_P018145 | AB021124     | Homo sapiens mRNA for N-acetylglucosamine 6-O-sulfotransferase, complete cds [AB021124]                         | 0.2223 | -0.0020 | 168 |
| A_01_P015223 | NM_144490    | Homo sapiens A kinase (PRKA) anchor protein 11 (AKAP11), transcript variant 2, mRNA. [NM_144490]                | 0.2282 | -0.0014 | 169 |
| A_01_P017266 | NM_005468    | Homo sapiens N-acetylated alpha-linked acidic dipeptidase-like 1 (NAALADL1), mRNA [NM_005468]                   | 0.2323 | -0.0012 | 170 |
| A_01_P012875 | NM_022165    | Homo sapiens lin-7 homolog B (C. elegans) (LIN7B), mRNA. [NM_022165]                                            | 0.2484 | -0.0024 | 171 |
| A_01_P015030 | NM_006925    | Homo sapiens splicing factor, arginine/serine-rich 5 (SFRS5), mRNA [NM_006925]                                  | 0.2636 | -0.0009 | 172 |
| A_01_P005762 | NM_019092    | Homo sapiens hypothetical protein KIAA1164 (KIAA1164), mRNA [NM_019092]                                         | 0.2652 | -0.0016 | 173 |
| A_01_P013708 | NM_001008234 | Homo sapiens hypothetical gene supported by BC036588 (LOC400657), mRNA. [NM_001008234]                          | 0.2594 | -0.0026 | 174 |
| A_01_P000450 | NM_016442    | Homo sapiens type 1 tumor necrosis factor receptor shedding aminopeptidase regulator (ARTS-1), mRNA [NM_016442] | 0.2691 | -0.0044 | 175 |
| A_01_P019269 | NM_023039    | Homo sapiens ankyrin repeat, family A (RFXANK-like), 2 (ANKRA2), mRNA.                                          | 0.2786 | -0.0001 | 176 |

|              |              | [NM_023039]                                                                                                                                                   |        |         |     |
|--------------|--------------|---------------------------------------------------------------------------------------------------------------------------------------------------------------|--------|---------|-----|
| A_01_P016236 | NM_080662    | Homo sapiens peroxisomal biogenesis factor 11 gamma (PEX11G), mRNA. [NM_080662]                                                                               | 0.2844 | -0.0040 | 177 |
| A_01_P005375 | NM_030751    | Homo sapiens transcription factor 8 (represses interleukin 2 expression) (TCF8), mRNA [NM_030751]                                                             | 0.2526 | -0.0017 | 178 |
| A_01_P003557 | NM_006550    | Homo sapiens fibrinogen silencer binding protein (FSBP), mRNA [NM_006550]                                                                                     | 0.2724 | -0.0041 | 179 |
| A_01_P012207 | XR_012806    | PREDICTED: Macaca mulatta similar to cyclic nucleotide gated channel alpha 1 (LOC704891), mRNA [XR_012806]                                                    | 0.2917 | -0.0039 | 180 |
| A_01_P008374 | NM_080759    | Homo sapiens dachshund homolog 1 (Drosophila) (DACH1), transcript variant 1, mRNA [NM_080759]                                                                 | 0.2980 | -0.0008 | 181 |
| A_01_P007050 | A_01_P007050 | Unknown                                                                                                                                                       | 0.3001 | -0.0024 | 182 |
| A_01_P016238 | XR_013013    | PREDICTED: Macaca mulatta similar to Zinc finger CW-type PWWP domain protein 1 homolog (LOC711911), mRNA [XR_013013]                                          | 0.2575 | -0.0025 | 183 |
| A_01_P012775 | NM_033258    | Homo sapiens guanine nucleotide binding protein (G protein), gamma 8 (GNG8), mRNA [NM_033258]                                                                 | 0.2812 | -0.0048 | 184 |
| A_01_P004470 | NM_017644    | Homo sapiens DRE1 protein (DRE1), mRNA [NM_017644]                                                                                                            | 0.2883 | -0.0011 | 185 |
| A_01_P011760 | NM_024335    | Homo sapiens iroquois homeobox protein 6 (IRX6), mRNA. [NM_024335]                                                                                            | 0.2997 | -0.0027 | 186 |
| A_01_P000634 | A_01_P000634 | Unknown                                                                                                                                                       | 0.3189 | -0.0018 | 187 |
| A_01_P013045 | NM_198057    | Homo sapiens delta sleep inducing peptide, immunoreactor (DSIPI), transcript variant 1, mRNA [NM_198057]                                                      | 0.3193 | -0.0032 | 188 |
| A_01_P005641 | NM_005269    | Homo sapiens glioma-associated oncogene homolog (zinc finger protein) (GLI), mRNA [NM_005269]                                                                 | 0.3316 | -0.0035 | 189 |
| A_01_P018564 | NM_017737    | Homo sapiens chromosome 1 open reading frame 39 (C1orf39), mRNA [NM_017737]                                                                                   | 0.3157 | -0.0039 | 190 |
| A_01_P005675 | NM_199334    | Homo sapiens thyroid hormone receptor, alpha (erythroblastic leukemia viral (v-erb-a) oncogene homolog, avian) (THRA), transcript variant 1, mRNA [NM_199334] | 0.3308 | -0.0039 | 191 |
| A_01_P015392 | NM_001004299 | Homo sapiens FLJ43980 protein (FLJ43980), mRNA. [NM_001004299]                                                                                                | 0.3164 | -0.0050 | 192 |
| A_01_P002915 | NM_016585    | Homo sapiens Theg homolog (mouse) (THEG), transcript variant 1, mRNA [NM_016585]                                                                              | 0.3356 | -0.0013 | 193 |
| A_01_P012281 | NM_130390    | Homo sapiens tripartite motif-containing                                                                                                                      | 0.3194 | -0.0044 | 194 |



|              |              |                                                                                                                                                       |        |         |     |
|--------------|--------------|-------------------------------------------------------------------------------------------------------------------------------------------------------|--------|---------|-----|
|              |              | 34 (TRIM34), transcript variant 3, mRNA. [NM_130390]                                                                                                  |        |         |     |
| A_01_P009533 | NM_020752    | Homo sapiens G protein-coupled receptor 158 (GPR158), mRNA. [NM_020752]                                                                               | 0.3509 | -0.0007 | 195 |
| A_01_P009763 | NM_001277    | Homo sapiens choline kinase alpha (CHKA), transcript variant 1, mRNA [NM_001277]                                                                      | 0.3418 | -0.0056 | 196 |
| A_01_P007500 | NM_007038    | Homo sapiens a disintegrin-like and metalloprotease (reprolysin type) with thrombospondin type 1 motif, 5 (aggrecanase-2) (ADAMTS5), mRNA [NM_007038] | 0.3486 | -0.0046 | 197 |
| A_01_P000276 | NM_145043    | Homo sapiens nei like 2 (E. coli) (NEIL2), mRNA. [NM_145043]                                                                                          | 0.3533 | -0.0037 | 198 |
| A_01_P015666 | NM_080718    | Homo sapiens T-box 5 (TBX5), transcript variant 2, mRNA [NM_080718]                                                                                   | 0.3803 | -0.0009 | 199 |
| A_01_P001570 | NM_177444    | Homo sapiens PTPRF interacting protein, binding protein 1 (liprin beta 1) (PPFIBP1), transcript variant 2, mRNA. [NM_177444]                          | 0.3989 | -0.0078 | 200 |
| A_01_P005258 | A_01_P005258 | Unknown                                                                                                                                               | 0.4063 | -0.0055 | 201 |
| A_01_P014819 | NM_024014    | Homo sapiens homeo box A6 (HOXA6), mRNA. [NM_024014]                                                                                                  | 0.3652 | -0.0060 | 202 |
| A_01_P017300 | A_01_P017300 | Unknown                                                                                                                                               | 0.4272 | -0.0042 | 203 |
| A_01_P013244 | NM_001085    | Homo sapiens serine (or cysteine) proteinase inhibitor, clade A (alpha-1 antiproteinase, antitrypsin), member 3 (SERPINA3), mRNA. [NM_001085]         | 0.8166 | -0.0109 | 204 |
| A_01_P013420 | NM_153007    | Homo sapiens outer dense fiber of sperm tails 4 (ODF4), mRNA [NM_153007]                                                                              | 1.2039 | -0.0072 | 205 |
